# Supplementary material for: National, longitudinal NASCITA birth cohort study to investigate the health of Italian children and potential influencing factors
Source: PubMed Central journal article supplement — BMJ Open. 2022 Nov 15;12(11):e063394. doi: 10.1136/bmjopen-2022-063394 (PMC9668025; doi:10.1136/bmjopen-2022-063394), 2022-11-15
Supplement: bmjopen-2022-063394.draft_revisions.pdf [file bmjopen-2022-063394.draft_revisions.pdf]

# BMJ Open

BMJ Open is committed to open peer review. As part of this commitment we make the peer review history of every article we publish publicly available.

When an article is published we post the peer reviewers' comments and the authors' responses online. We also post the versions of the paper that were used during peer review. These are the versions that the peer review comments apply to.

The versions of the paper that follow are the versions that were submitted during the peer review process. They are not the versions of record or the final published versions. They should not be cited or distributed as the published version of this manuscript.

BMJ Open is an open access journal and the full, final, typeset and author-corrected version of record of the manuscript is available on our site with no access controls, subscription charges or pay-per-view fees (<http://bmjopen.bmj.com>).

If you have any questions on BMJ Open's open peer review process please email [info.bmjopen@bmj.com](mailto:info.bmjopen@bmj.com)

# BMJ Open

## Cohort profile: The national, longitudinal NASCITA Cohort study

|                               |                                                                                                                                                                                                                                                                                                                                                                                                                                                                                                                                                                               |
|-------------------------------|-------------------------------------------------------------------------------------------------------------------------------------------------------------------------------------------------------------------------------------------------------------------------------------------------------------------------------------------------------------------------------------------------------------------------------------------------------------------------------------------------------------------------------------------------------------------------------|
| Journal:                      | <i>BMJ Open</i>                                                                                                                                                                                                                                                                                                                                                                                                                                                                                                                                                               |
| Manuscript ID                 | bmjopen-2022-063394                                                                                                                                                                                                                                                                                                                                                                                                                                                                                                                                                           |
| Article Type:                 | Cohort profile                                                                                                                                                                                                                                                                                                                                                                                                                                                                                                                                                                |
| Date Submitted by the Author: | 30-Mar-2022                                                                                                                                                                                                                                                                                                                                                                                                                                                                                                                                                                   |
| Complete List of Authors:     | Pandolfini, Chiara; Istituto di Ricerche Farmacologiche Mario Negri, Department of Public Health<br>Clavenna, Antonio; Istituto di Ricerche Farmacologiche Mario Negri, Department of Public Health<br>Cartabia, Massimo; Istituto di Ricerche Farmacologiche Mario Negri, Department of Public Health<br>Campi, Rita; Istituto di Ricerche Farmacologiche Mario Negri, Department of Public Health<br>Bonati, Maurizio; Istituto di Ricerche Farmacologiche Mario Negri, Department of Public Health<br>Work Group, NASCITA; Istituto di Ricerche Farmacologiche Mario Negri |
| Keywords:                     | Quality in health care < HEALTH SERVICES ADMINISTRATION & MANAGEMENT, NEONATOLOGY, Community child health < PAEDIATRICS, Paediatric A&E and ambulatory care < PAEDIATRICS, PERINATOLOGY                                                                                                                                                                                                                                                                                                                                                                                       |
|                               |                                                                                                                                                                                                                                                                                                                                                                                                                                                                                                                                                                               |

SCHOLARONE™  
Manuscripts

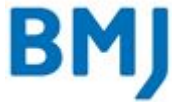

I, the Submitting Author has the right to grant and does grant on behalf of all authors of the Work (as defined in the below author licence), an exclusive licence and/or a non-exclusive licence for contributions from authors who are: i) UK Crown employees; ii) where BMJ has agreed a CC-BY licence shall apply, and/or iii) in accordance with the terms applicable for US Federal Government officers or employees acting as part of their official duties; on a worldwide, perpetual, irrevocable, royalty-free basis to BMJ Publishing Group Ltd ("BMJ") its licensees and where the relevant Journal is co-owned by BMJ to the co-owners of the Journal, to publish the Work in this journal and any other BMJ products and to exploit all rights, as set out in our [licence](#).

The Submitting Author accepts and understands that any supply made under these terms is made by BMJ to the Submitting Author unless you are acting as an employee on behalf of your employer or a postgraduate student of an affiliated institution which is paying any applicable article publishing charge ("APC") for Open Access articles. Where the Submitting Author wishes to make the Work available on an Open Access basis (and intends to pay the relevant APC), the terms of reuse of such Open Access shall be governed by a Creative Commons licence – details of these licences and which [Creative Commons](#) licence will apply to this Work are set out in our licence referred to above.

Other than as permitted in any relevant BMJ Author's Self Archiving Policies, I confirm this Work has not been accepted for publication elsewhere, is not being considered for publication elsewhere and does not duplicate material already published. I confirm all authors consent to publication of this Work and authorise the granting of this licence.

1  
2  
3 **1 Cohort profile: The national, longitudinal NASCITA Cohort study**  
4

5  
6 2 Chiara Pandolfini\*, Antonio Clavenna, Massimo Cartabia, Rita Campi, Maurizio Bonati, and  
7  
8 3 the NASCITA Work Group  
9

10  
11 4  
12  
13  
14 5 Laboratory for Mother and Child Health, Public Health Department, Istituto di Ricerche  
15  
16 6 Farmacologiche Mario Negri IRCCS, Milan, Italy  
17  
18

19  
20 7  
21  
22 8 **Emails:** [Chiara.pandolfini@marionegri.it](mailto:Chiara.pandolfini@marionegri.it); [Antonio.clavenna@marionegri.it](mailto:Antonio.clavenna@marionegri.it);  
23  
24  
25 9 [Massimo.cartabia@marionegri.it](mailto:Massimo.cartabia@marionegri.it); [Rita.campi@marionegri.it](mailto:Rita.campi@marionegri.it); [Maurizio.bonati@marionegri.it](mailto:Maurizio.bonati@marionegri.it)  
26  
27

28 10  
29  
30  
31 11 **\*Corresponding author:** Chiara Pandolfini  
32

33  
34 12 Laboratory for Mother and Child Health, Public Health Department  
35

36  
37 13 Istituto di Ricerche Farmacologiche Mario Negri IRCCS  
38

39  
40 14 Via Mario Negri 2  
41

42  
43 15 20156 Milan, Italy  
44

45  
46 16 chiara.pandolfini@marionegri.it  
47  
48

49 17

50  
51 18 **Word count:** 3669  
52  
53

54 19  
55  
56  
57  
58  
59  
60

1  
2  
3 21 **ABSTRACT**  
4  
5

6 22 **Purpose** The NASCITA Study, a national level, population-based, prospective cohort study,  
7  
8 23 was set up to better understand the early health status of Italian children, comprising their  
9  
10 24 physical, cognitive, and psychological development, and how it is affected by social and  
11  
12 25 health determinants, including nurturing care. NASCITA will also assess geographical  
13  
14 26 differences and disparities in health care.  
15  
16

17  
18 27 **Participants** Participating family paediatricians from throughout Italy enrolled infants born  
19  
20 28 during the enrolment period (April 2019-July 2020). The 5054 newborns seen by the 139  
21  
22 29 paediatricians for at least two visits, including the first well-child visit, and for whom parental  
23  
24 30 consent was given, make up the baseline population.  
25  
26

27  
28 31 **Findings to date** Mothers had a mean age at delivery of 33.1 years and tended to have a high  
29  
30 32 or medium level of education (42.5% university and 41.7% high school degrees) and to be  
31  
32 33 employed (69.7%). One third (36.1%) took folic acid supplementation appropriately, and  
33  
34 34 6.5% smoked or consumed alcohol (10.0%) during pregnancy.  
35  
36

37  
38 35 One third (31.7%) of deliveries were caesarean deliveries.  
39

40 36 Concerning the newborns, 5.8% had a low birthweight and 6.2% were born  
41  
42 37 prematurely. The majority (87.7%) slept in the supine position and 63.6% were exclusively  
43  
44 38 breastfed at one month, with a decreasing North to South prevalence ( $\chi^2_{152}$ ;  $p < 0.001$ ).  
45  
46

47 39 Significant North-South differences were found in all areas, including parental  
48  
49 40 education, behaviours in pregnancy, and hospital practices.  
50  
51

52 41 When compared with national level data, the cohort population's distribution, maternal  
53  
54 42 socio-demographic characteristics, and newborn physical characteristics reflect those of the  
55  
56 43 Italian population.  
57  
58  
59  
60

1  
2  
3 44 **Future plans:** Data will continue to be collected during the well-child visits until the children  
4  
5 45 are 6 years old and multiple health outcomes will be studied, spanning child development and  
6  
7 46 illness, as well as potentially related factors including caregiving routines. The findings will  
8  
9 47 be used to develop specific interventions to improve children's health.  
10  
11  
12

13 48 **Registration:** Clinicaltrials.gov: NCT03894566  
14  
15  
16 49

17  
18  
19 50 **Key words:** Cohort Studies; Child; Health; Infant, Newborn; Italy; Population  
20  
21 51 Characteristics; Public Health;  
22  
23  
24 52

### 27 53 **Strengths and limitations of this study**

- 30 54
- 31 • The NASCITA study is one of few involving the paediatricians directly as  
32 protagonist in cohort design and data collection. The paediatricians' primary role  
33 permits them to contribute first-hand to improving the cohort's functioning, to  
34 56 implement the recommended changes in practice resulting from the findings, and to  
35 57 achieve a "holistic" evaluation, including information on growth, health status, drug  
36 58 prescriptions, diagnostic exams and specialist visits, data from clinical examinations  
37 59 and screenings, integrated with information obtained from the parents.  
38  
39  
40  
41  
42  
43  
44 60
  - 45 61 • The newborn population is representative of the national newborn population in terms  
46 62 of geographical distribution and characteristics.
  - 47  
48  
49  
50  
51 63 • The population is restricted to the children assigned to the participating paediatricians,  
52  
53 64 and this may lead to a somewhat selected sample because many of the paediatricians  
54  
55 65 are part of the national Paediatricians' Cultural Association (ACP) and may have  
56  
57 66 joined it because they are more inclined to participate in research than others. The  
58  
59 67 geographic distribution of the paediatricians, however, is representative of Italy's

- 1  
2  
3 68 North-Centre-South division, and the paediatricians do not choose which children to  
4  
5 69 follow, but receive those assigned to them by the local health unit.  
6  
7  
8 70 • The newborn population reflects that of the newborn population normally followed by  
9  
10 71 family paediatricians in Italy, but not those with serious health problems who are  
11  
12 72 likely followed, at least in the first period of their lives, by hospital staff or specialists  
13  
14 73 and not by the family paediatrician.  
15  
16  
17 74 • NASCITA does not collect biological samples due to the costs of data collection and  
18  
19 75 storage and will therefore not be able to evaluate genetic or immunological factors, for  
20  
21 76 example. Resources and efforts were utilized, however, to achieve the largest  
22  
23 77 population size possible in order to have enough power to study common child  
24  
25 78 exposures and outcomes.  
26  
27  
28  
29  
30  
31  
32  
33  
34  
35  
36  
37  
38  
39  
40  
41  
42  
43  
44  
45  
46  
47  
48  
49  
50  
51  
52  
53  
54  
55  
56  
57  
58  
59  
60

## 92 INTRODUCTION

93 Infancy and childhood are periods of rapid growth and development and contribute  
94 significantly to well-being, health status, and behaviour throughout life.[1] In fact, many  
95 common diseases and challenges in adult life can be traced back to early childhood,[2,3] but  
96 how specific social factors, socioeconomic status, living conditions, parental and stakeholder  
97 care, and attitudes act on the well-being of children or in creating health inequalities among  
98 children is still poorly understood. Interactions between these health determinants also need to  
99 be investigated.[4,5]

100 Prospective birth cohort studies are studies that follow a group of newborns for an  
101 extended period of time and permit the collection of accurate information about exposures,  
102 outcomes, and several covariates.[6] Many birth cohorts have been set up worldwide,[7,8]  
103 some as early as 1921 in Europe,[9] and have contributed to knowledge in numerous areas,  
104 from medical to social ones.[10–12]

105 Cohort characteristics vary greatly from one cohort to another, as do their objectives,  
106 with some cohorts focused on one specific area, such as environmental factors and their effect  
107 on health, and others on multiple areas. Some cohorts collect data retrospectively, others  
108 prospectively. Some collect only written data, others also biological samples.

109 Two reviews of cohorts in Europe have been carried out, one from 2013 that gave a general  
110 description of birth and pregnancy cohorts in Europe[7] and the second, from 2020, that gave  
111 a more detailed description of cohorts that recruited at birth and not during pregnancy.[13]

112 These reviews showed that many cohorts have been set up in northern and western Europe  
113 and that the study areas, and their range, varied greatly. The more recent review[13] showed  
114 that many of the cohorts are relatively recent, with half of the 111 European cohorts  
115 beginning after 2000, and that their methodologies differed significantly. This review also  
116 showed that few, relatively recent cohorts focused on family context (nurturing care) and its



1  
2  
3 117 impact. Nurturing care refers to the environment created by caregivers that is attentive to  
4  
5 118 children's health and nutritional and social needs and has been shown to positively influence  
6  
7 119 children's health, growth, and development.[2] Nurturing care is a central issue;[14] it offers  
8  
9  
10 120 possibilities for interventions to promote maximum health, social, and cognitive development,  
11  
12 121 and should be a priority study area.

13  
14 122 In Italy, the population is becoming more heterogeneous, and sociodemographic and  
15  
16 123 geographic differences, such as education and migrant status, have been associated with  
17  
18 124 health disparities.[15,16] Italy, in fact, has a public, universal healthcare system that should  
19  
20 125 pose no legal or financial barriers to subgroups of the population, but considerable health  
21  
22 126 inequalities exist[15] and arise from differences in health behaviour, exposure, environment,  
23  
24 127 genes, etc.

25  
26  
27  
28 128 Various cohorts have been carried out in Italy, most with general aims and with data  
29  
30 129 collection limited in time or to specific geographical contexts.[17–25] Nine prospective  
31  
32 130 cohorts have been set up in Italy,[17,20,22,23,25–28] starting from 2000, some of which  
33  
34 131 recruited in pregnancy and some at birth. All these cohorts began data collection at  
35  
36 132 recruitment, through clinical visits, questionnaires, in-person or telephone interviews, and  
37  
38 133 medical records. The largest of these cohorts, the NINFEA, recruited participants online. The  
39  
40 134 population sizes of these cohorts ranged from 274-7500. The oldest cohort, the Genetic and  
41  
42 135 Environment: Prospective Study on Infancy in Italy (GASPII), began in 2005, and the newest,  
43  
44 136 the Neonatal Environmental and Health Outcomes (NEHO), in 2018. One cohort,  
45  
46 137 MUBICOS, specifically enrolled twins, and recruited them at in eight participating Italian  
47  
48 138 hospitals. The MUBICOS cohort is the only one currently recruiting. Only three of these  
49  
50 139 cohorts aimed to be representative of the Italian geographical context, North, Centre, and  
51  
52  
53  
54  
55  
56 140 South: the NINFEA, ICON, and MUBICOS cohorts.

1  
2  
3 141 The NASCITA study (*NAscere e creSCere in ITAlia*), a longitudinal, prospective,  
4  
5 142 national level, population-based birth cohort, was set up in 2019 to improve the understanding  
6  
7 143 of the early health status of Italian children and how it is affected by social and health  
8  
9 144 determinants, including nurturing care. Like many other cohorts, it addresses multiple  
10  
11 145 research questions.[29,30] The central role of the paediatrician in data collection on overall  
12  
13 146 health and growth and in interaction with patients is a unique quality of NASCITA, however,  
14  
15 147 and is possible in Italy because primary care for children is guaranteed by the family  
16  
17 148 paediatrician, unlike in many other countries.[31] The data will be based on the  
18  
19 149 paediatrician's assessment and diagnosis of health status and outcomes instead of on parental  
20  
21 150 recounting or medical records, leading to more accurate data and avoiding possible cultural  
22  
23 151 and socio-demographic influences on data recall.[32] NASCITA will be able to collect data  
24  
25 152 from throughout the national context and will therefore be able to assess regional differences  
26  
27 153 and disparities in health behaviours and healthcare.

28  
29 154 The main aim of the NASCITA cohort is to build a national observatory, starting from  
30  
31 155 the paediatricians' office, to evaluate physical, cognitive, and psychological development, and  
32  
33 156 health status and health resource use during the first six years of life in a group of newborns,  
34  
35 157 and to evaluate potentially associated factors. The findings will be used to develop specific  
36  
37 158 prevention measures and interventions to improve the health status of children, contributing to  
38  
39 159 the life-course approach being increasingly prioritized world-wide.[33]

40  
41 160 This cohort profile paper describes the rationale behind the NASCITA Cohort, the  
42  
43 161 study design, and characteristics of the population of enrolled newborns, and those of their  
44  
45 162 families.

46  
47 163

48  
49 164

## 165 **COHORT DESCRIPTION**

166 In Italy, health care is provided free or at a minimal charge. Children are assigned to a family  
167 paediatrician by the Local Health Unit and receive care from that paediatrician until they are  
168 at least six years old. Seven well-child visits are scheduled by the paediatrician in the first six  
169 years of a child's life to monitor growth and development and offer preventive care.

170 Additional visits are organized when needed. The NASCITA cohort was set up by the  
171 Laboratory for Mother and Child Health of the Istituto di Ricerche Farmacologiche Mario  
172 Negri IRCCS in Milan in collaboration with the national Paediatric Cultural Association  
173 (ACP) and was designed to be embedded in Italian paediatric primary care practice. Data are,  
174 in fact, collected directly by the paediatrician and mostly during the well-child visits. The  
175 study was approved by the Fondazione IRCCS Istituto Neurologico "Carlo Besta" ethics  
176 committee on 6 February 2019 (Verbale n 59).

177 Paediatrician participation is voluntary and no compensation is given. Paediatricians  
178 who chose to participate provided initial information, such as contact information and area of  
179 residence, through an online form. A total of 139 paediatricians from throughout Italy,  
180 representing all geographic areas of the country, agreed to participate. Enrolment took place  
181 between April 2019 and July 2020 and, within this time frame, each paediatrician enrolled,  
182 for a 1-year period, all newborns presenting for their first visit (which routinely takes place in  
183 the first 45 days of life in Italy) and whose parents gave informed consent. No other inclusion  
184 or exclusion criteria were present for enrolment.

185 Only children who were seen by the paediatricians for at least two visits, including the  
186 first well-child visit, were considered for the baseline population. Children who had not had a  
187 second visit were excluded in order to avoid including those seen by the paediatrician only in  
188 a transitory manner. Newborns will be followed-up until they are at least six years old.

1  
2  
3 189 Multiple health outcomes will be studied in the NASCITA Cohort, including the  
4  
5 190 relationship between child development and nurturing care.[34] Specific factors that will be  
6  
7 191 evaluated are disease prevention and treatment actions, nutrition (breastfeeding and diet),  
8  
9 192 caregiving routine, home opportunities to explore and learn, parental adherence to the  
10  
11 193 recommendations for better child care and development, and how all these things relate to  
12  
13 194 child growth and development. Some maternal and paternal periconceptional characteristics  
14  
15 195 will also be evaluated, considering their role in offspring health. The influence of  
16  
17 196 geographical settings in educational and socialization opportunities available for young  
18  
19 197 children and in the care provided by the family paediatricians and by the national health  
20  
21 198 service will also be evaluated.  
22  
23  
24  
25

26 199 Paediatricians collected data on the newborns during the well-child visits held so far  
27  
28 200 through online forms. These forms were created for each of the planned well-child visits,  
29  
30 201 based on the foreseen age range,[34] and revised by a group of paediatricians and other  
31  
32 202 participants (pharmacists, educators, parents), who make up the technical-scientific  
33  
34 203 committee. The data collected vary as the children grow, with age-appropriate measures (e.g.  
35  
36 204 breastfeeding, neurodevelopmental parameters). An additional form is available online to  
37  
38 205 paediatricians to also collect data during any caregiver-paediatrician telephone contact or  
39  
40 206 extra visits. The children's records can be accessed at any time to complete any missing data.  
41  
42 207 Efforts are being made to reduce the amount of missing information, such as emailing or  
43  
44 208 calling paediatricians and implementing a system that notifies the paediatricians about  
45  
46 209 incomplete data. The more technological aspects of the NASCITA study, such as the web  
47  
48 210 portal and online platform for data input and modification, have been described in detail in a  
49  
50 211 separate article.[35]  
51  
52  
53  
54

55 212 Data is continuously being monitored and cleaned, and is analysed periodically. The  
56  
57 213 Kruskal-Wallis test was used to analyse continuous variables, and the chi-squared test was  
58  
59  
60

1  
2  
3 214 used for the categorical variables. All p-values <0.05 were considered statistically significant  
4  
5 215 and were labelled with an asterisk in the tables. Additional details on the NASCITA Cohort  
6  
7 216 are described in the protocol.[34] The NASCITA study's website is available at  
8  
9  
10 217 <https://coortenascita.marionegri.it>.

218

## 219 FINDINGS TO DATE

### 220 Characteristics of study participants

21 The cohort population consists of 5054 newborns, recruited by 139 paediatricians. The  
22  
23 222 paediatricians enrolled an average of 76.2% of the newborns assigned to them by the local  
24  
25  
26 223 health unit.

27  
28 224 The demographic characteristics of the parents are reported in Table 1. *Missing data*  
29  
30 225 *were excluded from the percentages in all tables because they were limited to <2,5% for all*  
31  
32 226 *the main variables, except maternal pregnancy body mass index (BMI) (limited to <5%).* The  
33  
34  
35 227 mean age of the mothers at delivery was 33.1 years (median 33). If only primiparas are  
36  
37 228 considered, average maternal age was 32.3 years (range 16-54 years). The majority of  
38  
39 229 mothers and fathers was born in Italy (86.6% and 88.7%, respectively). A higher rate of both  
40  
41  
42 230 parents born abroad was found for families in the North compared to the South of Italy.  
43  
44 231 Mothers tended to have a high or medium level of education (42.5% had a university degree  
45  
46 232 and 41.7 a high school degree), and to be employed (69.7%). Fewer fathers had a high level  
47  
48 233 of education (26.7% university degree), but the majority was employed (96.1%). In general,  
49  
50  
51 234 there were higher levels of maternal and paternal education in the Centre, and lower levels of  
52  
53 235 maternal and paternal employment in the South.

236

237

238 **Table 1.** Maternal and paternal characteristics

|                                               | North<br><i>n</i> (%) | Centre<br><i>n</i> (%) | South<br><i>n</i> (%) | Total<br><i>n</i> (%) | <i>P</i> value |
|-----------------------------------------------|-----------------------|------------------------|-----------------------|-----------------------|----------------|
| Average maternal age at delivery, yrs; SD     | 32.9; 5.2             | 33.7; 5.3              | 32.9; 5.6             | 33.1; 5.4             | 0.0005*        |
| Median maternal age at delivery, yrs; min-max | 33.0; 18-51           | 34; 17-54              | 33; 16-51             | 33; 16-54             |                |
| Maternal age class at delivery, yrs           |                       |                        |                       |                       | 0.0034*        |
| <25                                           | 142 (6.1)             | 46 (4.8)               | 118 (7.1)             | 306 (6.2)             |                |
| 25-29                                         | 436 (18.9)            | 136 (14.3)             | 328 (19.7)            | 900 (18.2)            |                |
| 30-34                                         | 836 (36.2)            | 353 (37.0)             | 582 (34.9)            | 1771 (35.9)           |                |
| 35-39                                         | 667 (28.9)            | 309 (32.4)             | 462 (27.7)            | 1438 (29.2)           |                |
| 40+                                           | 229 (9.9)             | 110 (11.5)             | 179 (10.7)            | 518 (10.5)            |                |
| Mother born in Italy                          | 1894 (81.1)           | 837 (86.5)             | 1626 (93.9)           | 4357 (86.6)           | <0.0001*       |
| Father born in Italy                          | 1950 (83.9)           | 841 (87.5)             | 1646 (95.8)           | 4437 (88.7)           | <0.0001*       |
| Both parents born abroad                      | 305 (13.1)            | 87 (9.1)               | 38 (2.2)              | 430 (8.6)             | <0.0001*       |
| Maternal education                            |                       |                        |                       |                       | <0.0001*       |
| Elementary/Middle school                      | 365 (15.8)            | 95 (9.8)               | 331 (19.4)            | 971 (15.8)            |                |
| Highschool                                    | 1020 (44.0)           | 337 (34.9)             | 725 (42.4)            | 2082 (41.7)           |                |
| University                                    | 933 (40.3)            | 535 (55.3)             | 655 (38.3)            | 2123 (42.5)           |                |
| Maternal employment                           | 1740 (74.8)           | 747 (76.5)             | 1009 (58.8)           | 3496 (69.7)           | <0.0001*       |
| Paternal education                            |                       |                        |                       |                       | <0.0001*       |
| Elementary/Middle school                      | 547 (23.7)            | 137 (14.3)             | 471 (27.8)            | 1155 (23.3)           |                |
| Highschool                                    | 1191 (51.8)           | 454 (47.5)             | 826 (48.8)            | 2471 (50.0)           |                |
| University                                    | 561 (24.4)            | 364 (38.1)             | 394 (23.3)            | 1319 (26.7)           |                |
| Paternal employment                           | 2281 (98.4)           | 929 (96.2)             | 1586 (93.1)           | 4796 (96.1)           | <0.0001*       |
| Maternal civil status                         |                       |                        |                       |                       | <0.0001*       |
| Married/living together                       | 2222 (96.0)           | 897 (93.0)             | 1653 (96.9)           | 4772 (95.7)           |                |
| Single/separated/divorced/widow               | 92 (4.0)              | 68 (7.0)               | 53 (3.1)              | 213 (4.3)             |                |
| Child living with both parents                | 2305 (98.6)           | 957 (98.0)             | 1687 (97.6)           | 4949 (98.2)           | 0.0550         |

239

240

241 Many mothers (19.2%) had a chronic disease, such as hyper- or hypothyroidism, or asthma  
 242 (40.1% and 10.2% of mothers with a chronic disease, respectively) (Table 2). The presence of  
 243 chronic diseases in the mothers, and in the families in general, was more frequent in southern  
 244 Italy.

245

246

247

248

249

250

251

252

253 **Table 2.** Pregnancy characteristics

|                                                 | <i>North<br/>n (%)</i> | <i>Centre<br/>n (%)</i> | <i>South<br/>n (%)</i> | <i>Total<br/>n (%)</i> | <i>P value</i> |
|-------------------------------------------------|------------------------|-------------------------|------------------------|------------------------|----------------|
| Natural conception                              | 2204 (94.4)            | 912 (93.2)              | 1594 (94.7)            | 4710 (94.2)            | 0.229          |
| Parity: Primiparous                             | 1235 (53.0)            | 594 (60.9)              | 962 (55.6)             | 2791 (55.4)            | 0.0002 *       |
| No previous pregnancies ( <i>primigravida</i> ) | 1033 (44.3)            | 477 (49.0)              | 824 (47.8)             | 2334 (46.4)            | 0.0180 *       |
| <i>n</i> previous pregnancies (2697 women)      |                        |                         |                        |                        | 0.0986         |
| 1                                               | 708 (54.8)             | 285 (58.0)              | 467 (52.6)             | 1460 (54.7)            |                |
| 2                                               | 389 (30.1)             | 151 (30.8)              | 274 (30.9)             | 814 (30.5)             |                |
| >2                                              | 195 (15.1)             | 55 (11.2)               | 146 (16.5)             | 396 (14.8)             |                |
| Pre-pregnancy BMI                               |                        |                         |                        |                        | <0.0001 *      |
| Underweight                                     | 208 (9.3)              | 80 (8.6)                | 94 (5.6)               | 382 (7.9)              |                |
| Normal weight                                   | 1.489 (66.5)           | 653 (70.2)              | 1.098 (65.4)           | 3.240 (66.8)           |                |
| Overweight                                      | 362 (16.2)             | 145 (15.6)              | 339 (20.2)             | 846 (17.5)             |                |
| Obese                                           | 179 (8.0)              | 52 (5.6)                | 149 (8.9)              | 380 (7.8)              |                |
| Gestational weight gain                         |                        |                         |                        |                        | 0.3498         |
| Inadequate                                      | 804 (36.2)             | 344 (37.1)              | 609 (36.7)             | 1.757 (36.6)           |                |
| Optimal                                         | 876 (39.5)             | 378 (40.8)              | 628 (37.9)             | 1.882 (39.2)           |                |
| Excessive                                       | 538 (24.3)             | 204 (22.0)              | 422 (25.4)             | 1.164 (24.2)           |                |
| Healthy pregnancy                               | 1992 (85.2)            | 839 (85.9)              | 1497 (86.5)            | 4328 (85.8)            | 0.4839         |
| Chronic disease in mother                       | 397 (17.0)             | 188 (19.2)              | 387 (22.3)             | 972 (19.2)             | 0.0001 *       |
| Folic acid taken appropriately*                 | 910 (39.5)             | 400 (41.0)              | 496 (28.6)             | 1806 (36.1)            | <0.0001 *      |
| Vaccination in pregnancy                        | 1121 (49.1)            | 278 (28.9)              | 229 (13.4)             | 1628 (32.8)            | <0.0001 *      |
| Most common vaccines                            |                        |                         |                        |                        |                |
| DTaP                                            | 1076 (21.3)            | 267 (5.3)               | 199 (3.9)              | 1542 (30.5)            | <0.0001 *      |
| Influenza                                       | 239 (4.7)              | 89 (1.8)                | 73 (1.4)               | 401 (7.9)              | <0.0001 *      |
| If current smoker                               |                        |                         |                        |                        |                |
| Any smoke during pregnancy                      | 163 (7.0)              | 64 (6.7)                | 97 (5.7)               | 324 (6.5)              | 0.2238         |
| Occasionally                                    | 58 (36.0)              | 22 (34.4)               | 36 (37.5)              | 116 (36.1)             |                |
| Daily                                           | 103 (64.0)             | 42 (65.6)               | 60 (62.5)              | 205 (63.9)             |                |
| If DAILY, how much                              |                        |                         |                        |                        |                |
| Little ( $\leq 10$ /day)                        | 91 (88.3)              | 38 (90.5)               | 49 (81.7)              | 178 (86.8)             | 0.4055         |
| Moderate (11-19/day)                            | 10 (9.7)               | 2 (4.8)                 | 9 (15.0)               | 21 (10.2)              |                |
| A lot (1 pack/day)                              | 2 (1.9)                | 2 (4.8)                 | 2 (3.3)                | 6 (2.9)                |                |
| If alcohol use in pregnancy                     |                        |                         |                        |                        | <0.0001 *      |
| Any alcohol during pregnancy                    | 335 (14.8)             | 63 (6.6)                | 96 (5.6)               | 494 (10.0)             |                |
| Occasionally                                    | 325 (97.0)             | 61 (96.8)               | 94 (97.9)              | 480 (97.2)             | 0.9208         |
| Daily                                           | 10 (3.0)               | 2 (3.2)                 | 2 (2.1)                | 14 (2.8)               |                |

\* Folic acid supplementation was considered appropriate if folic acid was taken from at least one month before, and throughout, at least the first trimester of pregnancy. It was classified as "inappropriate" if folic acid was taken only once the pregnancy began, even if throughout the pregnancy, or if it was taken, but data were missing as to how and when.

## 259 **Pregnancy**

260 The pregnancy characteristics, reported in Table 2, revealed a 94.2% rate of natural  
 261 conception. In all, 14.2% of mothers had a gestational disorder, in 35.0% of whom it was  
 262 gestational diabetes. Concerning maternal behaviours in pregnancy, folic acid  
 263 supplementation was often inappropriate (3043 mothers, 60.8%), or not present at all (160,  
 264 3.2%), and vaccination rates in pregnancy were low (1628, 32.8%), involving mostly DTaP  
 265 (94.8%). In terms of geographical differences, there were lower rates of proper folic acid

1  
2  
3 266 supplementation and vaccination in the South. A total of 324 (6.5%) mothers smoked during  
4  
5 267 pregnancy, 63.9% of whom smoked daily. Alcohol was consumed by 494 (10.0%) mothers,  
6  
7 268 14 of whom drank it on a daily basis. The rate of alcohol consumption during pregnancy was  
8  
9  
10 269 higher in the North. Maternal pre-pregnancy BMI showed that one fourth (25.3%) of mothers  
11  
12 270 was overweight or obese, with a higher in southern Italy compared to the North and Centre. In  
13  
14 271 general, one fourth of mothers (24.2%) gained an amount of weight greater than that  
15  
16 272 recommended by the US Institute of Medicine (IOM).  
17  
18  
19 273

## 21 274 **Delivery**

23  
24 275 Concerning the birth characteristics (Table 3), almost all births were in-hospital (4980,  
25  
26 276 98.8%), 4895 (97.1%) were singleton births, and 1600 (31.7%) were caesarean births.  
27  
28 277 Hospitals provided skin to skin contact in three fourths of cases (3676, 73.8%), provided  
29  
30 278 intramuscular vitamin K prophylaxis at birth (4644, 92.9%), and gave newborns artificial  
31  
32 279 milk (1987, 40.1%), sugared water (215, 4.3%), or water (17, 0.3%). The rate of exclusive  
33  
34 280 breastfeeding at discharge was 69.6% (3509 mothers). In terms of national-level differences,  
35  
36 281 in the South caesarean births were more common, and rates of use of formula milk and  
37  
38 282 sugared water during hospital stay were higher. The rate of exclusive breastfeeding at  
39  
40 283 discharge was lower in the South (62.1% compared to 73.7% and 72.8% in the North and  
41  
42 284 Centre, respectively).  
43  
44  
45  
46  
47 285

## 49 286 **Newborns**

51 287 Table 3 reports the newborns' characteristics. In all, 2471 (48.9%) were female. Birthweight  
52  
53 288 ranged from 635 to 5885 grams (median 3270 grams), with 294 (5.8%) low birthweight  
54  
55 289 (<2500 grams) newborns and 234 (4.6%) weighing >4000 grams. A total of 315 (6.2%)  
56  
57 290 newborns were born prematurely (22-36 weeks gestational age (GA)), five (1.6%) of whom  
58  
59  
60



291 were extremely preterm (<28 weeks GA). Concerning weight and GA, 525 (10.5%) infants  
 292 were small for gestational age (SGA) and 452 (9.0%) were large for gestational age (LGA). In  
 293 all, 161 (3.2%) newborns needed resuscitation at birth, 161 (3.2%) were born with birth  
 294 defects, and 398 (7.9%) were born with a neonatal disease. The most common diseases were  
 295 jaundice (106 newborns), respiratory distress (59), and neonatal hypoglycaemia (47).  
 296 Furthermore, 16.5% of newborns had to be admitted to a neonatal care ward and 4.3% to a  
 297 neonatal intensive care unit.

298

299 **Table 3.** Delivery, in-hospital, breast feeding, and newborn characteristics

|                                                  | North<br>n (%)        | Centre<br>n (%)         | South<br>n (%)         | Total<br>n (%)            | P value   |
|--------------------------------------------------|-----------------------|-------------------------|------------------------|---------------------------|-----------|
| Mean gestational age at birth, wks;<br>SD        | 39.0; 1.7             | 39.0; 1.6               | 38.9; 1.8              | 39.0; 1.7                 | 0.0158 *  |
| Gestational age category (weeks)                 |                       |                         |                        |                           | 0.0009 *  |
| 22-36                                            | 124 (5.3)             | 50 (5.1)                | 141 (8.1)              | 315 (6.2)                 |           |
| 37-41                                            | 2197 (93.9)           | 923 (94.3)              | 1571 (90.8)            | 4691 (92.9)               |           |
| 42-44                                            | 18 (0.8)              | 6 (0.6)                 | 19 (1.1)               | 43 (0.9)                  |           |
| Birth in hospital                                | 2323 (99.4)           | 966 (98.9)              | 1691 (98.0)            | 4980 (98.8)               | 0.0003 *  |
| Single vs twin births                            |                       |                         |                        |                           | <0.0001 * |
| Single birth                                     | 2294 (98.2)           | 954 (97.5)              | 1647 (95.3)            | 4895 (97.1)               |           |
| Twins                                            | 42 (1.8)              | 23 (2.4)                | 82 (4.7)               | 147 (2.9)                 |           |
| Birth type                                       |                       |                         |                        |                           | <0.0001 * |
| Spontaneous                                      | 1639 (70.0)           | 608 (62.1)              | 993 (57.3)             | 3240 (64.1)               |           |
| Caesarean                                        | 575 (24.6)            | 328 (33.5)              | 697 (40.2)             | 1600 (31.7)               |           |
| Instrumental birth                               | 126 (5.4)             | 43 (4.4)                | 44 (2.5)               | 213 (4.2)                 |           |
| Skin to skin contact immediately after<br>birth  | 1880 (82.1)           | 778 (80.1)              | 1018 (59.2)            | 3676 (73.8)               | <0.0001 * |
| Intramuscular Vitamin K at birth                 | 2204 (95.2)           | 940 (96.7)              | 1500 (87.7)            | 4644 (92.9)               | <0.0001 * |
| Breast feeding in hospital                       | 2098 (91.4)           | 906 (93.0)              | 1.476 (87.7)           | 4480 (90.5)               | <0.0001 * |
| Exclusively breastfed upon hospital<br>discharge | 1720 (73.7)           | 713 (72.8)              | 1076 (62.1)            | 3509 (69.6)               | <0.0001 * |
| <b>NEWBORNS</b>                                  |                       |                         |                        |                           |           |
| Female                                           | 1116 (47.7)           | 515 (52.6)              | 843 (48.6)             | 2474 (49.0)               | 0.0361 *  |
| Mean birthweight, gr; SD                         | 3278.0; 483.8         | 3250.3; 487.5           | 3225.8; 501.4          | 3254.7; 491.1             | 0.0055 *  |
| Median birthweight, gr; min-max                  | 3290.0; 635 -<br>4850 | 3250.0; 1.155 -<br>4750 | 3250.0; 1160 -<br>5885 | 3270.0; 635.0 -<br>5885.0 |           |
| Birthweight class, gr                            |                       |                         |                        |                           | 0.0589    |
| <2.500                                           | 124 (5.3)             | 53 (5.4)                | 117 (6.8)              | 294 (5.8)                 |           |
| 2.500-4.000                                      | 2098 (89.7)           | 874 (89.3)              | 1552 (89.6)            | 4524 (89.5)               |           |
| >4.000                                           | 118 (5.0)             | 52 (5.3)                | 64 (3.7)               | 234 (4.6)                 |           |
| Weight for gestational age                       |                       |                         |                        |                           | 0.8335    |
| Small for gestational age (SGA)                  | 236 (10.1)            | 97 (10.0)               | 192 (11.2)             | 525 (10.5)                |           |
| Appropriate for gestational age<br>(AGA)         | 1884 (80.9)           | 785 (80.8)              | 1373 (79.9)            | 4042 (80.5)               |           |
| Large for gestational age (LGA)                  | 210 (9.0)             | 89 (9.2)                | 153 (8.9)              | 452 (9.0)                 |           |
| Mean length, cm; SD                              | 49.7; 2.5             | 49.8; 2.3               | 49.5; 2.4              | 49.6; 2.4                 | 0.0018 *  |
| Malformation at birth                            | 80 (3.4)              | 28 (2.9)                | 53 (3.1)               | 161 (3.2)                 | 0.6565    |
| Disease at birth                                 | 172 (7.4)             | 77 (7.9)                | 149 (8.6)              | 398 (7.9)                 | 0.3466    |
| Admitted to Neonatal Unit                        | 398 (17.4)            | 181 (18.7)              | 241 (14.0)             | 820 (16.5)                | 0.0019 *  |
| Admitted to Neonatal Intensive Care<br>Unit      | 84 (3.6)              | 34 (3.5)                | 97 (5.6)               | 215 (4.3)                 | 0.0030 *  |

### 300 **First visit with the family paediatrician**

301 The average age of the newborns at their first out-of-hospital visit was 25.7 days, with a  
 302 median of 24.0 days (table 4). A total of 3187 (63.6%) newborns were being exclusively  
 303 breastfed at the time of their first visit, while, of the remaining newborns, over one third  
 304 (35.9%) was receiving formula milk and two thirds (64.1%) was receiving a mixed feeding  
 305 regimen.

307 **Table 4.** Characteristics at first visit with paediatrician (7-45 days old)

|                                                  | <i>North</i><br><i>n (%)</i> | <i>Centre</i><br><i>n (%)</i> | <i>South</i><br><i>n (%)</i> | <i>Total</i><br><i>n (%)</i> | <i>P value</i> |
|--------------------------------------------------|------------------------------|-------------------------------|------------------------------|------------------------------|----------------|
| Mean age, days; SD                               |                              |                               |                              | 25.7; 24.9                   |                |
| Breast feeding                                   |                              |                               |                              |                              | < 0.0001 *     |
| Exclusive                                        | 1577 (67.9)                  | 639 (65.5)                    | 971 (56.7)                   | 3187 (63.6)                  |                |
| Mixed breast feeding                             | 476 (20.4)                   | 252 (25.8)                    | 440 (25.6)                   | 1168 (64.1)                  |                |
| Artificial formula only                          | 270 (11.6)                   | 84 (8.6)                      | 300 (17.5)                   | 654 (35.9)                   |                |
| Usual sleep position                             |                              |                               |                              |                              | <0.0001 *      |
| Supine                                           | 2069 (90.3)                  | 849 (87.3)                    | 1444 (84.5)                  | 4362 (87.7)                  |                |
| Side                                             | 92 (4.0)                     | 65 (6.7)                      | 215 (12.6)                   | 372 (7.5)                    |                |
| Prone                                            | 130 (5.7)                    | 59 (6.1)                      | 50 (2.9)                     | 239 (4.8)                    |                |
| Vitamin D prophylaxis ongoing/initiated at visit | 2.297 (98.7)                 | 942 (96.3)                    | 1.642 (95.6)                 | 4881 (97.4)                  | <0.0001 *      |
| Drug prescribed at visit (excluding vitamin D)   | 108 (4.6)                    | 27 (2.8)                      | 41 (2.4)                     | 176 (3.5)                    | <0.0001 *      |

308  
 309  
 310 The prevalence of exclusive breastfeeding at the first well-child visit decreased from  
 311 North to South ( $\chi^2_{\text{t}}$  52;  $p < 0.001$ ). In the South of Italy, 17.5% of newborns received only  
 312 formula, versus 11.6% in the North and 8.6% in the Centre.

313 Concerning sleeping position, the majority of newborns slept in the supine position  
 314 (87.7%), while 4.8% slept in the prone position. There were geographical differences in  
 315 sleeping position as well: the percentage of supine position was higher in the North (90.3%)  
 316 and lower in the South (84.5%) ( $\chi^2_{\text{t}}$  31.2;  $p < 0.001$ ).

317 Concerning prophylaxis, 97.4% were receiving vitamin D prophylaxis at their first  
 318 visit. A total of 176 (3.5%) newborns received a drug prescription during their visit and the

1  
2  
3 319 drugs most commonly prescribed were simethicone (17%), nystatin (14%), and ophthalmic  
4  
5 320 tobramycin (10%).  
6

7  
8 321 The results of the screening procedures for normal development (Table 4) show that  
9  
10 322 most of the newborns had positive developmental assessment results. Very few were found to  
11  
12 323 have problems with motor (9 newborns) or sensory and social (7) skills.  
13

14 324 The distribution of the cohort population reflects that of the Italian population, based  
15  
16 325 on the ISTAT data from 2019,[36] which report that 46% of the national population resides in  
17  
18 326 the North, 20% in the Centre, and 34% in the South/islands. The socio-demographic  
19  
20 327 characteristics of the mothers also reflect national level data, where the mothers' average age  
21  
22 328 at birth of the first child is 32.1 years, as reported in the 2019 Eurostat data for Italy,[37]  
23  
24 329 compared to 32.3 in the NASCITA cohort. The main characteristics at birth of mothers and  
25  
26 330 newborns in the NASCITA cohort and in the national reference data, the Ministry of Health's  
27  
28 331 Certificato di assistenza al parto (CeDAP) 2019 data,[38] are listed in Table 5. The maternal  
29  
30 332 level of education is higher in NASCITA compared to national level data (42.5% compared to  
31  
32 333 31.2% of mothers have a university degree),[38] while the percentage of foreign-born mothers  
33  
34 334 on the other hand, is lower in NASCITA (13.4% vs 21%), with both results likely to be due to  
35  
36 335 language barriers that preclude recruitment and to the more frequent transfers to other  
37  
38 336 areas/paediatricians on the part of families with parents who were born abroad. These  
39  
40 337 differences are also true when NASCITA cohort data are compared with those of the Italian  
41  
42 338 NINFEA[22] and PiccoliPiù[39] cohorts, i.e., the general population characteristics are  
43  
44 339 similar, while the maternal level of education is higher in NASCITA and the percentage of  
45  
46 340 foreign-born parents is lower. The distribution of the newborns' anthropometric measures is  
47  
48 341 also comparable with that of the national data.[40]  
49  
50  
51  
52  
53  
54  
55  
56  
57  
58  
59  
60

344 **Table 5.** Main characteristics at birth of mothers and newborns in the NASCITA cohort and  
 345 in the national reference data (CeDAP)

|                                             | <i>NASCITA</i><br>% population | <i>CeDAP</i><br>% population |
|---------------------------------------------|--------------------------------|------------------------------|
| <b>MOTHERS</b>                              |                                |                              |
| Mother born in Italy                        | 86.6                           | 79                           |
| Mother's age, yrs                           |                                |                              |
| ≤29                                         | 24.4                           | 25.3                         |
| 30-39                                       | 65.1                           | 63.5                         |
| 40+                                         | 10.5                           | 11.2                         |
| Maternal education                          |                                |                              |
| Elementary/Middle school                    | 23.3                           | 25.9                         |
| Highschool                                  | 50.0                           | 42.9                         |
| University                                  | 42.5                           | 31.2                         |
| Maternal employment                         | 69.7                           | 55.0                         |
| Healthy pregnancy                           | 85.8                           | 85.2                         |
| Natural conception                          | 94.2                           | 96.9                         |
| Caesarean section                           | 31.7                           | 31.8                         |
| <b>NEWBORNS</b>                             |                                |                              |
| Twins                                       | 2.9                            | 1.6                          |
| Birthweight                                 |                                |                              |
| <1500 gr                                    | 0.5                            | 0.9                          |
| 1500-2499 gr                                | 5.3                            | 6.2                          |
| 2500-3999 gr                                | 89.5                           | 87.6                         |
| >4000 gr                                    | 4.6                            | 5.2                          |
| Gestational age at birth /<br>Preterm birth |                                |                              |
| 22-36 weeks                                 | 6.2                            | 6.8                          |
| 37-41                                       | 92.9                           | 92.7                         |
| >41                                         | 0.9                            | 0.5                          |
| Malformation at birth                       | 3.2                            | 1.3                          |

346  
 347  
 348 Newborns participating in the NASCITA cohort, and their families, are representative  
 349 of the Italian population in terms of geographical distribution and sociodemographic  
 350 characteristics. The analysis of the characteristics during pregnancy and at birth confirms the  
 351 existence of large geographical differences in attitudes, in particular concerning folic acid  
 352 intake, immunization, caesarean birth, and exclusive breastfeeding prevalence.

353 One fourth of the NASCITA cohort mothers (25.3%) were overweight or obese,  
 354 although this rate seems to be lower than the European rate of 30%-50%.[41] The rate of  
 355 caesarean births in the NASCITA cohort, involving almost one in three births, confirms  
 356 Italy's standing as one of the countries with the highest rate in Europe. Large regional  
 357 differences exist, with much higher rates in the South.[42]

1  
2  
3 358 Concerning aspects related to nurturing care and good practices, to be implemented  
4  
5 359 from before pregnancy to the first few months of life and beyond, such as folic acid intake,  
6  
7 360 smoke and alcohol avoidance, and breastfeeding, the data collected on these behaviours show  
8  
9 361 that more must be done. Concerning exclusive breastfeeding, for example, the rates in Italy at  
10  
11 362 hospital discharge were already low, represented by just over two thirds of mothers (69.6%),  
12  
13 363 and the rate decreased to 63.6% at the first visit with the paediatrician. Concerning folic acid  
14  
15 364 supplementation, only about one third of mothers took it in an appropriate manner, with an  
16  
17 365 even worse situation in the South. Concerning smoking and alcohol use, the NASCITA data  
18  
19 366 showed that 6.5% of mothers continued to smoke during pregnancy and that one in ten drank  
20  
21 367 alcohol during pregnancy.  
22  
23  
24  
25

26 368 Geographical differences in the health status and in the care of mother and newborns  
27  
28 369 are striking, in particular when looking southern Italy. Pregnant women living in southern  
29  
30 370 Italy were less compliant with folic acid prophylaxis and with recommended vaccinations.  
31  
32 371 They were also at greater risk of being overweight or obese at the beginning of the pregnancy.  
33  
34 372 A greater rate of caesarean delivery was reported, neonates were less frequently exposed to  
35  
36 373 skin-to-skin contact with their mothers at birth, and were less likely to be breastfed at  
37  
38 374 discharge from the hospital, and consequently, also at the first well-child visit. Differences in  
39  
40 375 the exclusive breastfeeding rate at hospital discharge after delivery between the South and  
41  
42 376 other geographic areas of Italy persist also when excluding preterm or low birthweight  
43  
44 377 newborns, or newborns with congenital malformations (data not shown).  
45  
46  
47  
48  
49  
50

378

### 51 379 **Strengths and limitations**

52  
53 380 The NASCITA study is one of the few involving the paediatricians directly as protagonists in  
54  
55 381 cohort design and data collection. The paediatricians' direct role in data collection is a major  
56  
57 382 strength in that it permits a "holistic" evaluation, including information on growth, health  
58  
59  
60

1  
2  
3 383 status, drug prescriptions, diagnostic exams and specialist visits, data from clinical  
4  
5 384 examinations, and screenings integrated with information obtained from the parents. Another  
6  
7 385 strength of this study is that the newborn population is representative of the national newborn  
8  
9 386 population in terms of geographical distribution and characteristics. Furthermore, strategies  
10  
11 387 were implemented to maintain paediatrician participation and to minimize loss to follow-  
12  
13 388 up,[62] involving, for example, maintaining contact with the paediatricians through periodic  
14  
15 389 emails providing updates on the progress of the cohort, providing paediatricians with timely  
16  
17 390 email assistance with data input, and sending periodic newsletters listing recent publications  
18  
19 391 on other cohort studies. Similarly, strategies were implemented to maintain parental  
20  
21 392 participation and minimize loss to follow-up of the newborns, such as providing information  
22  
23 393 dedicated to parents on the NASCITA study's web portal on common childhood diseases.  
24  
25 394 Another strength of the NASCITA study is that efforts were made to retrospectively collect  
26  
27 395 data on the mothers and fathers from before, and during, the pregnancy.  
28  
29  
30  
31  
32  
33

34 396 The limitations of this study are, first, that the population is restricted to the children  
35  
36 397 assigned to the participating paediatricians, and this may lead to a somewhat selected sample  
37  
38 398 because many of the paediatricians are part of the national Paediatricians' Cultural  
39  
40 399 Association (ACP) and may have joined NASCITA because they are more inclined to  
41  
42 400 participate in research than others. The geographic distribution of the paediatricians, however,  
43  
44 401 is representative of Italy's North-Centre-South division, and the paediatricians do not choose  
45  
46 402 which children to follow, but receive those assigned to them by the local health unit.  
47  
48  
49

50 403 A second limit is that the newborn population reflects that of the newborn population  
51  
52 404 normally followed by family paediatricians in Italy, which includes all newborns who do not  
53  
54 405 have serious health problems that would prevent them from being regularly followed, at least  
55  
56 406 in the first period of their lives, by a family paediatrician. Newborns with serious health  
57  
58 407 problems are usually followed by hospital staff or specialists, and would therefore not likely  
59  
60

1  
2  
3 408 have been taken to the first well-child visit within the first 45 days of life (when paediatricians  
4  
5 409 enrolled newborns in the study).

6  
7 410 The third limit of the NASCITA cohort is that it does not collect biological samples due to the  
8  
9 411 costs of data collection and storage. It will therefore not be able to evaluate genetic or  
10  
11 412 immunological factors, for example. Resources and efforts were utilized, however, to achieve  
12  
13 413 the largest population size possible in order to have enough power to study common child  
14  
15 414 exposures and outcomes.  
16  
17  
18  
19

20 415

## 21 22 23 416 **PATIENT AND PUBLIC INVOLVMENT**

24  
25 417 Patients were indirectly involved in the development of the research questions and  
26  
27 418 questionnaires in that the technical-scientific committee that was set up to supervise the study,  
28  
29 419 and that collaborates in creating and revising the questionnaires, involves professionals (e.g.,  
30  
31 420 paediatricians, pharmacists, educators) who are also parents. The public is involved through  
32  
33 421 the dissemination of cohort results and information on childhood diseases or conditions to  
34  
35 422 parents and the general public on the study's website.  
36  
37  
38  
39

40 423

## 41 424 **COLLABORATION**

42  
43 425 Data from the NASCITA study will be available upon reasonable request, after approval by  
44  
45 426 NASCITA's technical-scientific committee, and for non-commercial purposes. We encourage  
46  
47 427 collaboration between different cohorts, for example to merge, or compare, data on chosen  
48  
49 428 topics of study.  
50  
51  
52

53 429

54 430

55 431

56 432

1  
2  
3 433 **FURTHER DETAILS**  
4

5 434 **Competing interests**  
6

7 435 None declared.  
8  
9

10 436

11  
12 437 **Funding**  
13

14 438 This work was supported by resources from the Laboratory for Mother and Child Health and  
15

16 439 by an economic contribution by the *Associazione Amici del Mario Negri* (Grant number:  
17

18 440 N/A).  
19  
20

21 441

22  
23  
24 442 **Patient consent for publication**  
25

26 443 Not required.  
27  
28

29 444

30 445 **Ethics approval and consent to participate**  
31

32 446 Newborns were enrolled only if parental consent was given. The study was approved by the  
33

34 447 Fondazione IRCCS Istituto Neurologico "Carlo Besta" ethics committee on 6 February 2019  
35

36 448 (Verbale n 59).  
37  
38

39 449

40 450 **Provenance and peer review**  
41  
42

43 451 Not commissioned; externally peer reviewed.  
44  
45

46 452

47 453 **Data availability statement**  
48  
49

50 454 The datasets used and/or analysed during the current study are available from the  
51

52 455 corresponding author upon reasonable request and approval by the technical-scientific  
53

54 456 committee, and only for non-commercial purposes.  
55  
56

57 457  
58  
59  
60



1  
2  
3 458  
45 459 **Orcid ID**6  
7 460 Chiara Pandolfini <https://orcid.org/0000-0001-9809-2991>  
8  
9

10 461

11  
12 462 **Author contributions**

13  
14 463 MB designed the Study. MB and AC directed the study's implementation. AC and MC  
15  
16 464 designed the analytical strategy. MC carried out the statistical analyses. AC and MC helped to  
17  
18 465 interpret the findings. CP conducted the literature review and was a major contributor in  
19  
20 466 writing the manuscript. All authors contributed to, and revised, the article. All authors read  
21  
22 467 and approved the final manuscript.  
23  
24

25 468

26  
27  
28 469 **Acknowledgements**

29  
30  
31 470 The authors would like to thank Claudia Pansieri for her collaboration in setting up and  
32  
33 471 running the NASCITA Cohort, Michele Zanetti for the informatics aspects of the setting up  
34  
35 472 and running of the cohort and its website, and Maria Grazia Calati and Daniela Miglio for  
36  
37 473 assistance in management of the cohort and in communication with the paediatricians.  
38  
39

40  
41 474 Collaborating author names: **Scientific Committee:** Antonio Addis, Renata Bortolus,42  
43 475 Annalisa Campomori, Sergio Cattani, Luca De Fiore, Federico Marchetti, Cristiana Piloni,44  
45 476 Valeria Renzetti, Chiara Segré, Giorgio Tamburlini. **Research area-specific expert**46  
47 477 **collaborators:** Rosario Cavallo, Sergio Conti Nibali, Stefania Manetti, Gherardo Rapisardi,48  
49 478 Giacomo Toffol. **Local-level coordinators:** Vicenza Briscioli, Carla Cafaro, Cristoforo50  
51 479 Cocchiara, Isodiana Crupi, Patrizia Del Balzo, Laura Dell'edera, Chiara Di Francesco,52  
53 480 Alberto Ferrando, Francesca Grassa, Chiara Guidoni, Stefania Manetti, Claudio Mangialavori,54  
55 481 Stefano Marinoni, Francesca Marongiu, Fausta Matera, Paolo Moretti, Laura Olimpi, Angela56  
57 482 Pasinato, Ilaria Porro, Ippolita Roncoroni, Raffaella Schiro', Patrizia Seppia, Federica  
58  
59  
60

1  
2  
3 483 Zanetto. **Participating paediatricians:** Anna Aloisio, Elisabetta Anedda, Giuliana Apuzzo,  
4  
5 484 Giovanna Argo, Anna Armenio, Emanuela Ballerini, Monica Benedetti, Daniela Bertoli,  
6  
7 485 Stefano Bollettini, Chiara Bottalico, Aurora Bottiglieri, Vincenza Briscioli, Antonella Bruno,  
8  
9 486 Laura Brusadin, Mariantonietta Caiazzo, Patrizia Calamita, Miriana Callegari, Rosaria  
10  
11 487 Cambria, Rossella Claudia Cannavò, Maria Cristina Cantù, Domenico Capomolla, Anna  
12  
13 488 Caracciolo, Maria Concetta Carbone, Valeria Carraro, Gaetano Carrassi, Maria Laura  
14  
15 489 Cartiglia, Sara Casagrande, Ornella Castiglione, Rosario Salvatore Cavallo, Teresa Cazzato,  
16  
17 490 Maria Angela Cazzuffi, Melania Maria Giuseppina Cera, Jennifer Chiarolanza, Rosaria  
18  
19 491 China, Nicoletta Cimadamore, Roberto Cionini\*, Cristina Ciuffo, Cristoforo Cocchiara,  
20  
21 492 Damiano Colazzo, Sergio Conti Nibali, Anna Maria Costantini, Claudio Cravidi, Marialuisa  
22  
23 493 Criscione, Isodiana Crupi, Rita D'Agostino, Daniela Danieli, Luigi De Carlo, Marina De  
24  
25 494 Sanctis, Giuseppina De Santes, Patrizia Del Balzo, Gian Piero Del Bono, Chiara Di  
26  
27 495 Francesco, Maria Elisabetta Di Pietro, Maria Chiara Dini, Paolo Fiammengo, Micaela Foco,  
28  
29 496 Maria Teresa Fonte, Maria Frigeri, Andrea Galvagno, Matteo Gaudino, Stefania Genoni,  
30  
31 497 Silvia Giroto, Emma Maria Letizia Giugnini, Gianluca Gornati, Marta Gozzi, Francesca  
32  
33 498 Grassa, Chiara Guidoni, Enrica Heritier, Antonella Lavagetto, Raffaele Limauro, Alessandra  
34  
35 499 Magnelli, Maria Gabriella Maiolino, Monica Malventano, Stefania Manetti, Claudio  
36  
37 500 Mangialavori, Silvia Marchi, Natale Maresca, Federico Marolla, Francesca Marongiu, Agata  
38  
39 501 Martinelli, Chiara Martinez, Nicoletta Mascarello, Fausta Matera, Carla Matiotti, Elisabetta  
40  
41 502 Mazzucchi, Donatella Moggia, Paolo Moretti, Manuela Musetti, Paolo Nardini, Alberto Neri,  
42  
43 503 Patrizia Neri, Flavia Nicoloso, Laura Maria Olimpi, Giancarlo Ottonello, Giacinta Padula,  
44  
45 504 Paolo Maria Paganuzzi, Rosanna Palazzi, Alessandra Palmero, Maria Chiara Parisini, Angela  
46  
47 505 Pasinato, Giovannina Pastorelli, Marilena Pavoni, Lucia Peccarisi, Antonella Pellacani,  
48  
49 506 Cristina Perrera, Michela Picciotti, Ivo Picotto, Tiziana Piunti, Ilaria Porro, Francesca  
50  
51 507 Preziosi, Giuseppe Primavera, Miriam Prodi, Maria Letizia Rabbone, Innocenza Rafele,  
52  
53  
54  
55  
56  
57  
58  
59  
60

1  
2  
3 508 Laura Reali, Franziska Stefanie Rempp, Ada Riundi, Patrizia Rogari, Ippolita Roncoroni,  
4  
5 509 Paolo Rosas, Annarita Russo, Mariagrazia Saccà, Elisabetta Sala, Francesca Sala, Renato  
6  
7 510 Sansone, Francesca Santus, Vittoria Sarno, Alessandra Savino, Raffaella Schirò, Giuseppa  
8  
9 511 Scornavacca\*, Giovanni Giuliano Semprini, Maria Francesca Siracusano, Adelisa Spalla,  
10  
11 512 Gloria Sturaro, Giacomo Toffol, Maria Grazia Toma, Ettore Tomagra, Maria Tortorella,  
12  
13 513 Fausta Trentadue, Marina Trevisan, Silvia Tullisso, Roberta Usella, Anna Valente, Michele  
14  
15 514 Valente, Mariangela Valera, Edda Vernile, Valeria Vicario, Lucia Vignutelli, Paolo Vinci,  
16  
17 515 Lucia Vizziello, Rosette Zand, Marco Zanette, Federica Zanetto, Graziano Zucchi, Maria  
18  
19 516 Luisa Zuccolo. Roberto Cionini and Giuseppa Scornavacca unfortunately passed away.  
20  
21  
22  
23  
24  
25  
26  
27  
28  
29  
30  
31  
32  
33  
34  
35  
36  
37  
38  
39  
40  
41  
42  
43  
44  
45  
46  
47  
48  
49  
50  
51  
52  
53  
54  
55  
56  
57  
58  
59  
60

1  
2  
3 533  
4  
5  
6 534 **REFERENCES**  
7  
8  
9 535 1 An Executive Summary for The Lancet's Series. Advancing Early Childhood  
10 536 Development: from Science to Scale. The Lancet. 2016. <https://els-jbs-prod->  
11 537 [cdn.jbs.elsevierhealth.com/pb-](https://els-jbs-prod-cdn.jbs.elsevierhealth.com/pb-assets/Lancet/stories/series/e cd/Lancet_ECD_Executive_Summary-1507044811487.pdf)  
12 538 [assets/Lancet/stories/series/e cd/Lancet\\_ECD\\_Executive\\_Summary-1507044811487.pdf](https://els-jbs-prod-cdn.jbs.elsevierhealth.com/pb-assets/Lancet/stories/series/e cd/Lancet_ECD_Executive_Summary-1507044811487.pdf)  
13 539 (accessed 28 Mar 2022).  
14  
15  
16  
17  
18  
19  
20  
21 540 2 Black MM, Walker SP, Fernald LCH, *et al.* Early childhood development coming of age:  
22 541 science through the life course. *Lancet Lond Engl* 2017;**389**:77–90. doi:10.1016/S0140-  
23 542 6736(16)31389-7  
24  
25  
26  
27  
28  
29 543 3 Barouki R, Gluckman PD, Grandjean P, *et al.* Developmental origins of non-  
30 544 communicable disease: implications for research and public health. *Environ Health Glob*  
31 545 *Access Sci Source* 2012;**11**:42. doi:10.1186/1476-069X-11-42  
32  
33  
34  
35  
36  
37 546 4 Pillas D, Marmot M, Naicker K, *et al.* Social inequalities in early childhood health and  
38 547 development: a European-wide systematic review. *Pediatr Res* 2014;**76**:418–24.  
39 548 doi:10.1038/pr.2014.122  
40  
41  
42  
43  
44  
45 549 5 Andrea SB, Hooker ER, Messer LC, *et al.* Does the association between early life growth  
46 550 and later obesity differ by race/ethnicity or socioeconomic status? A systematic review.  
47 551 *Ann Epidemiol* 2017;**27**:583-592.e5. doi:10.1016/j.annepidem.2017.08.019  
48  
49  
50  
51  
52  
53 552 6 Canova C, Cantarutti A. Population-Based Birth Cohort Studies in Epidemiology. *Int J*  
54 553 *Environ Res Public Health* 2020;**17**:5276. doi:10.3390/ijerph17155276  
55  
56  
57  
58  
59  
60

- 1  
2  
3 554 7 Larsen PS, Kamper-Jørgensen M, Adamson A, *et al.* Pregnancy and Birth Cohort  
4  
5 555 Resources in Europe: a Large Opportunity for Aetiological Child Health Research:  
6  
7 556 Pregnancy and birth cohort resources in Europe. *Paediatr Perinat Epidemiol*  
8  
9 557 2013;**27**:393–414. doi:10.1111/ppe.12060  
10  
11  
12  
13 558 8 Thompson L, Kemp J, Wilson P, *et al.* What have birth cohort studies asked about  
14  
15 559 genetic, pre- and perinatal exposures and child and adolescent onset mental health  
16  
17 560 outcomes? A systematic review. *Eur Child Adolesc Psychiatry* 2010;**19**:1–15.  
18  
19 561 doi:10.1007/s00787-009-0045-4  
20  
21  
22  
23 562 9 Baxter-Jones AD, Cardy AH, Helms PJ, *et al.* Influence of socioeconomic conditions on  
24  
25 563 growth in infancy: the 1921 Aberdeen birth cohort. *Arch Dis Child* 1999;**81**:5–9.  
26  
27 564 doi:10.1136/adc.81.1.5  
28  
29  
30  
31 565 10 Bousquet J, Anto J, Sunyer J, *et al.* Pooling birth cohorts in allergy and asthma: European  
32  
33 566 Union-funded initiatives - a MeDALL, CHICOS, ENRIECO, and GA<sup>2</sup>LEN joint paper.  
34  
35 567 *Int Arch Allergy Immunol* 2013;**161**:1–10. doi:10.1159/000343018  
36  
37  
38  
39 568 11 Isong IA, Rao SR, Bind M-A, *et al.* Racial and Ethnic Disparities in Early Childhood  
40  
41 569 Obesity. *Pediatrics* 2018;**141**:e20170865. doi:10.1542/peds.2017-0865  
42  
43  
44  
45 570 12 Dodgeon B, Patalay P, Ploubidis GB, *et al.* Exploring the role of early-life circumstances,  
46  
47 571 abilities and achievements on well-being at age 50 years: evidence from the 1958 British  
48  
49 572 birth cohort study. *BMJ Open* 2020;**10**:e031416. doi:10.1136/bmjopen-2019-031416  
50  
51  
52  
53 573 13 Pansieri C, Pandolfini C, Clavenna A, *et al.* An Inventory of European Birth Cohorts. *Int*  
54  
55 574 *J Environ Res Public Health* 2020;**17**:3071. doi:10.3390/ijerph17093071  
56  
57  
58  
59  
60

- 1  
2  
3 575 14 World Health Organization, United Nations Children’s Fund, World Bank Group.  
4  
5 576 *Nurturing care for early childhood development: a framework for helping children*  
6  
7 577 *survive and thrive to transform health and human potential*. Geneva: World Health  
8  
9 578 Organization 2018. <https://apps.who.int/iris/handle/10665/345648> (accessed 29 Mar  
10  
11 579 2022).
- 12  
13  
14  
15 580 15 Bonati M, Campi R. What can we do to improve child health in southern Italy? *PLoS Med*  
16  
17 581 2005;**2**:e250. doi:10.1371/journal.pmed.0020250
- 18  
19  
20  
21 582 16 Landi S, Ivaldi E, Testi A. Socioeconomic status and waiting times for health services: An  
22  
23 583 international literature review and evidence from the Italian National Health System.  
24  
25 584 *Health Policy Amst Neth* 2018;**122**:334–51. doi:10.1016/j.healthpol.2018.01.003
- 26  
27  
28  
29 585 17 Porta D, Fantini MP. Prospective cohort studies of newborns in Italy to evaluate the role  
30  
31 586 of environmental and genetic characteristics on common childhood disorders. *Ital J*  
32  
33 587 *Pediatr* 2006;**32**:350–7.
- 34  
35  
36  
37 588 18 Porta D, Forastiere F, Di Lallo D, *et al.* [Enrolment and follow-up of a birth cohort in  
38  
39 589 Rome]. *Epidemiol Prev* 2007;**31**:303–8.
- 40  
41  
42  
43 590 19 Lanari M, Vandini S, Adorni F, *et al.* Prenatal tobacco smoke exposure increases  
44  
45 591 hospitalizations for bronchiolitis in infants. *Respir Res* 2015;**16**:152. doi:10.1186/s12931-  
46  
47 592 015-0312-5
- 48  
49  
50  
51 593 20 Barchitta M, Maugeri A, La Rosa MC, *et al.* Single Nucleotide Polymorphisms in  
52  
53 594 Vitamin D Receptor Gene Affect Birth Weight and the Risk of Preterm Birth: Results  
54  
55 595 From the “Mamma & Bambino” Cohort and A Meta-Analysis. *Nutrients* 2018;**10**:E1172.  
56  
57 596 doi:10.3390/nu10091172  
58  
59  
60

- 1  
2  
3 597 21 Brescianini S, Fagnani C, Toccaceli V, *et al.* An update on the Italian Twin Register:  
4  
5 598 advances in cohort recruitment, project building and network development. *Twin Res*  
6  
7 599 *Hum Genet Off J Int Soc Twin Stud* 2013;**16**:190–6. doi:10.1017/thg.2012.85  
8  
9  
10  
11 600 22 Richiardi L, Baussano I, Vizzini L, *et al.* Feasibility of recruiting a birth cohort through  
12  
13 601 the Internet: the experience of the NINFEA cohort. *Eur J Epidemiol* 2007;**22**:831–7.  
14  
15 602 doi:10.1007/s10654-007-9194-2  
16  
17  
18  
19 603 23 Farchi S, Forastiere F, Vecchi Brumatti L, *et al.* Piccolipiù, a multicenter birth cohort in  
20  
21 604 Italy: protocol of the study. *BMC Pediatr* 2014;**14**:36. doi:10.1186/1471-2431-14-36  
22  
23  
24  
25 605 24 Valent F, Mariuz M, Bin M, *et al.* Associations of prenatal mercury exposure from  
26  
27 606 maternal fish consumption and polyunsaturated fatty acids with child neurodevelopment:  
28  
29 607 a prospective cohort study in Italy. *J Epidemiol* 2013;**23**:360–70.  
30  
31 608 doi:10.2188/jea.je20120168  
32  
33  
34  
35 609 25 Lanari M, Prinelli F, Adorni F, *et al.* Risk factors for bronchiolitis hospitalization during  
36  
37 610 the first year of life in a multicenter Italian birth cohort. *Ital J Pediatr* 2015;**41**:40.  
38  
39 611 doi:10.1186/s13052-015-0149-z  
40  
41  
42  
43 612 26 Castriotta L, Rosolen V, Biggeri A, *et al.* The role of mercury, selenium and the Se-Hg  
44  
45 613 antagonism on cognitive neurodevelopment: A 40-month follow-up of the Italian mother-  
46  
47 614 child PHIME cohort. *Int J Hyg Environ Health* 2020;**230**:113604.  
48  
49 615 doi:10.1016/j.ijheh.2020.113604  
50  
51  
52  
53 616 27 Medda E, Toccaceli V, Fagnani C, *et al.* The Italian Twin Registry: An Update at 18  
54  
55 617 Years From Its Inception. *Twin Res Hum Genet Off J Int Soc Twin Stud* 2019;**22**:572–8.  
56  
57 618 doi:10.1017/thg.2019.75  
58  
59  
60

- 1  
2  
3 619 28 Ruggieri S, Drago G, Colombo P, *et al.* Three contaminated sites in southern Italy. The  
4  
5 620 Neonatal Environment and Health Outcomes cohort: protocol for a longitudinal birth  
6  
7 621 cohort study. *BMJ Open* 2019;**9**:e029471. doi:10.1136/bmjopen-2019-029471  
8  
9  
10  
11 622 29 Canova C, Zabeo V, Pitter G, *et al.* Association of maternal education, early infections,  
12  
13 623 and antibiotic use with celiac disease: a population-based birth cohort study in  
14  
15 624 northeastern Italy. *Am J Epidemiol* 2014;**180**:76–85. doi:10.1093/aje/kwu101  
16  
17  
18  
19 625 30 Pizzi C, Richiardi M, Charles M-A, *et al.* Measuring Child Socio-Economic Position in  
20  
21 626 Birth Cohort Research: The Development of a Novel Standardized Household Income  
22  
23 627 Indicator. *Int J Environ Res Public Health* 2020;**17**:1700. doi:10.3390/ijerph17051700  
24  
25  
26  
27 628 31 van Esso D, del Torso S, Hadjipanayis A, *et al.* Paediatric primary care in Europe:  
28  
29 629 variation between countries. *Arch Dis Child* 2010;**95**:791–5.  
30  
31 630 doi:10.1136/adc.2009.178459  
32  
33  
34  
35 631 32 Hansen S, Strøm M, Maslova E, *et al.* A Comparison of Three Methods to Measure  
36  
37 632 Asthma in Epidemiologic Studies: Results from the Danish National Birth Cohort. *PLoS*  
38  
39 633 *ONE* 2012;**7**:e36328. doi:10.1371/journal.pone.0036328  
40  
41  
42  
43 634 33 World Health Organization. Health through life stages. 2021.  
44  
45 635 <https://www.euro.who.int/en/health-topics/Life-stages/pages/life-course> (accessed 29 Mar  
46  
47 636 2022).  
48  
49  
50  
51 637 34 Pansieri C, Clavenna A, Pandolfini C, *et al.* NASCITA Italian birth cohort study: a study  
52  
53 638 protocol. *BMC Pediatr* 2020;**20**:80. doi:10.1186/s12887-020-1961-1  
54  
55  
56  
57  
58  
59  
60



- 1  
2  
3 639 35 Zanetti M, Clavenna A, Pandolfini C, *et al.* Informatics Methodology Used in the Web-  
4  
5 640 Based Portal of the NASCITA Cohort Study: Development and Implementation Study. *J*  
6  
7 641 *Med Internet Res* 2021;**23**:e23087. doi:10.2196/23087  
8  
9  
10  
11 642 36 Istituto Nazionale di Statistica (ISTAT). Annuario Statistico Italiano 2020. 2020.  
12  
13 643 <https://www.istat.it/it/archivio/251048> (accessed 28 Mar 2022).  
14  
15  
16 644 37 Eurostat. Statistics (2019 data).  
17  
18 645 <https://ec.europa.eu/eurostat/databrowser/view/tps00017/default/table?lang=en> (accessed  
19  
20 646 28 Mar 2022).  
21  
22  
23  
24 647 38 Ministero della Salute, Dipartimento della Qualità, Direzione Generale del Sistema  
25  
26 648 Informativo, Ufficio di Direzione Statistica. Certificato di assistenza al parto (CeDAP)-  
27  
28 649 Analisi dell'evento nascita- Anno 2019. Ministero della Salute 2021.  
29  
30 650 [https://www.salute.gov.it/imgs/C\\_17\\_pubblicazioni\\_3076\\_allegato.pdf](https://www.salute.gov.it/imgs/C_17_pubblicazioni_3076_allegato.pdf) (accessed 28 Mar  
31  
32 651 2022).  
33  
34  
35  
36  
37 652 39 Rusconi F, Gagliardi L, Gori E, *et al.* Perinatal maternal mental health is associated with  
38  
39 653 both infections and wheezing in early childhood. *Pediatr Allergy Immunol Off Publ Eur*  
40  
41 654 *Soc Pediatr Allergy Immunol* 2019;**30**:732–8. doi:10.1111/pai.13103  
42  
43  
44  
45 655 40 Bertino E, Spada E, Occhi L, *et al.* Neonatal anthropometric charts: the Italian neonatal  
46  
47 656 study compared with other European studies. *J Pediatr Gastroenterol Nutr* 2010;**51**:353–  
48  
49 657 61. doi:10.1097/MPG.0b013e3181da213e  
50  
51  
52  
53 658 41 Euro-Peristat Project. European Perinatal Health Report. Core indicators of the health and  
54  
55 659 care of pregnant women and babies in Europe in 2015. 2018. [www.europeristat.com](http://www.europeristat.com)  
56  
57 660 (accessed 28 Mar 2022).  
58  
59  
60

- 1  
2  
3 661 42 Laurita Longo V, Odjidja EN, Beia TK, *et al.* “An unnecessary cut?” multilevel health  
4  
5 662 systems analysis of drivers of caesarean sections rates in Italy: a systematic review. *BMC*  
6  
7 663 *Pregnancy Childbirth* 2020;**20**:770. doi:10.1186/s12884-020-03462-1  
8  
9  
10  
11 664  
12  
13  
14  
15  
16  
17  
18  
19  
20  
21  
22  
23  
24  
25  
26  
27  
28  
29  
30  
31  
32  
33  
34  
35  
36  
37  
38  
39  
40  
41  
42  
43  
44  
45  
46  
47  
48  
49  
50  
51  
52  
53  
54  
55  
56  
57  
58  
59  
60

For peer review only

# BMJ Open

## Cohort profile: the national, longitudinal NASCITA birth cohort study to investigate the health of Italian children and potential influencing factors

|                                 |                                                                                                                                                                                                                                                                                                                                                                                                                                                                                                                                                                               |
|---------------------------------|-------------------------------------------------------------------------------------------------------------------------------------------------------------------------------------------------------------------------------------------------------------------------------------------------------------------------------------------------------------------------------------------------------------------------------------------------------------------------------------------------------------------------------------------------------------------------------|
| Journal:                        | <i>BMJ Open</i>                                                                                                                                                                                                                                                                                                                                                                                                                                                                                                                                                               |
| Manuscript ID                   | bmjopen-2022-063394.R1                                                                                                                                                                                                                                                                                                                                                                                                                                                                                                                                                        |
| Article Type:                   | Cohort profile                                                                                                                                                                                                                                                                                                                                                                                                                                                                                                                                                                |
| Date Submitted by the Author:   | 12-Sep-2022                                                                                                                                                                                                                                                                                                                                                                                                                                                                                                                                                                   |
| Complete List of Authors:       | Pandolfini, Chiara; Istituto di Ricerche Farmacologiche Mario Negri, Department of Public Health<br>Clavenna, Antonio; Istituto di Ricerche Farmacologiche Mario Negri, Department of Public Health<br>Cartabia, Massimo; Istituto di Ricerche Farmacologiche Mario Negri, Department of Public Health<br>Campi, Rita; Istituto di Ricerche Farmacologiche Mario Negri, Department of Public Health<br>Bonati, Maurizio; Istituto di Ricerche Farmacologiche Mario Negri, Department of Public Health<br>Work Group, NASCITA; Istituto di Ricerche Farmacologiche Mario Negri |
| <b>Primary Subject Heading</b>: | Paediatrics                                                                                                                                                                                                                                                                                                                                                                                                                                                                                                                                                                   |
| Secondary Subject Heading:      | Qualitative research, General practice / Family practice                                                                                                                                                                                                                                                                                                                                                                                                                                                                                                                      |
| Keywords:                       | Quality in health care < HEALTH SERVICES ADMINISTRATION & MANAGEMENT, NEONATOLOGY, Community child health < PAEDIATRICS, Paediatric A&E and ambulatory care < PAEDIATRICS, PERINATOLOGY                                                                                                                                                                                                                                                                                                                                                                                       |
|                                 |                                                                                                                                                                                                                                                                                                                                                                                                                                                                                                                                                                               |

SCHOLARONE™  
Manuscripts

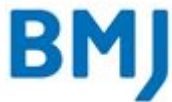

I, the Submitting Author has the right to grant and does grant on behalf of all authors of the Work (as defined in the below author licence), an exclusive licence and/or a non-exclusive licence for contributions from authors who are: i) UK Crown employees; ii) where BMJ has agreed a CC-BY licence shall apply, and/or iii) in accordance with the terms applicable for US Federal Government officers or employees acting as part of their official duties; on a worldwide, perpetual, irrevocable, royalty-free basis to BMJ Publishing Group Ltd ("BMJ") its licensees and where the relevant Journal is co-owned by BMJ to the co-owners of the Journal, to publish the Work in this journal and any other BMJ products and to exploit all rights, as set out in our [licence](#).

The Submitting Author accepts and understands that any supply made under these terms is made by BMJ to the Submitting Author unless you are acting as an employee on behalf of your employer or a postgraduate student of an affiliated institution which is paying any applicable article publishing charge ("APC") for Open Access articles. Where the Submitting Author wishes to make the Work available on an Open Access basis (and intends to pay the relevant APC), the terms of reuse of such Open Access shall be governed by a Creative Commons licence – details of these licences and which [Creative Commons](#) licence will apply to this Work are set out in our licence referred to above.

Other than as permitted in any relevant BMJ Author's Self Archiving Policies, I confirm this Work has not been accepted for publication elsewhere, is not being considered for publication elsewhere and does not duplicate material already published. I confirm all authors consent to publication of this Work and authorise the granting of this licence.

1  
2  
3 1 **Cohort profile: the national, longitudinal NASCITA birth cohort study to investigate the**  
4  
5 2 **health of Italian children and potential influencing factors**  
6  
7

8 3 Chiara Pandolfini\*, Antonio Clavenna, Massimo Cartabia, Rita Campi, Maurizio Bonati, and  
9 4 the NASCITA Work Group  
10  
11  
12

13 5  
14  
15 6 Laboratory for Mother and Child Health, Public Health Department, Istituto di Ricerche  
16  
17 7 Farmacologiche Mario Negri IRCCS, Milan, Italy  
18  
19  
20

21 8  
22  
23 9 **Emails:** [Chiara.pandolfini@marionegri.it](mailto:Chiara.pandolfini@marionegri.it); [Antonio.clavenna@marionegri.it](mailto:Antonio.clavenna@marionegri.it);  
24  
25 10 [Massimo.cartabia@marionegri.it](mailto:Massimo.cartabia@marionegri.it); [Rita.campi@marionegri.it](mailto:Rita.campi@marionegri.it); [Maurizio.bonati@marionegri.it](mailto:Maurizio.bonati@marionegri.it)  
26  
27  
28

29  
30  
31  
32  
33 12 **\*Correspondence to:**

34 13 Chiara Pandolfini

35  
36  
37 14 Laboratory for Mother and Child Health, Public Health Department

38  
39  
40 15 Istituto di Ricerche Farmacologiche Mario Negri IRCCS

41  
42  
43 16 Via Mario Negri 2

44  
45  
46 17 20156 Milan, Italy

47  
48  
49 18 chiara.pandolfini@marionegri.it  
50  
51  
52

53 19  
54  
55 20 **Word count:** 4185  
56  
57  
58

59 21  
60

1  
2  
3 **23 ABSTRACT**  
4  
5

6 **24 Purpose** The NASCITA Study, a national level, population-based, prospective cohort study,  
7  
8 **25** was set up to better understand the early health status of Italian children, comprising their  
9  
10 **26** physical, cognitive, and psychological development, and how it is affected by social and  
11  
12 **27** health determinants, including nurturing care. NASCITA will also assess geographical  
13  
14 **28** differences and disparities in health care.  
15  
16

17  
18 **29 Participants** Participating family paediatricians from throughout Italy enrolled infants born  
19  
20 **30** during the enrolment period (April 2019-July 2020). The 5054 newborns seen by the 139  
21  
22 **31** paediatricians for at least two visits, including the first well-child visit, and for whom parental  
23  
24 **32** consent was given, make up the baseline population.  
25  
26

27  
28 **33 Findings to date** Mothers had a mean age at delivery of 33.1 years and tended to have a high  
29  
30 **34** or medium level of education (42.5% university and 41.7% high school degrees) and to be  
31  
32 **35** employed (69.7%). One third (36.1%) took folic acid supplementation appropriately, and  
33  
34 **36** 6.5% smoked or consumed alcohol (10.0%) during pregnancy. One third (31.7%) of  
35  
36 **37** deliveries were caesarean deliveries. Concerning the newborns, 5.8% had a low birthweight  
37  
38 **38** and 6.2% were born prematurely. The majority (87.7%) slept in the supine position and  
39  
40 **39** 63.6% were exclusively breastfed at one month, with a decreasing North to South prevalence  
41  
42 **40** ( $\chi^2_t$  52;  $p < 0.001$ ). Significant North-South differences were found in all areas, including  
43  
44 **41** parental education, behaviours in pregnancy, and hospital practices. When compared with  
45  
46 **42** national level data, the cohort population's distribution, maternal socio-demographic  
47  
48 **43** characteristics, and newborn physical characteristics reflect those of the Italian population.  
49  
50

51  
52 **44 Future plans:** Data will continue to be collected during the well-child visits until the children  
53  
54 **45** are 6 years old and multiple health outcomes will be studied, spanning child development and  
55  
56  
57  
58  
59  
60

1  
2  
3 46 illness, as well as potentially related factors including caregiving routines. The findings will  
4  
5 47 be used to develop specific interventions to improve children's health.  
6  
7

8 48 **Study registration number:** ClinicalTrials.gov, NCT03894566.  
9  
10

11 49  
12  
13  
14 50 **Keywords:** Cohort Studies; Child; Health; Infant, Newborn; Italy; Population Characteristics;  
15  
16 51 Public Health  
17  
18

19 52  
20  
21  
22 53 **Strengths and limitations of this study**  
23  
24

- 25 54 • The NASCITA study is one of few involving paediatricians directly as protagonists in  
26  
27 cohort design and data collection.  
28 55  
29  
30 56 • The newborn population involved is representative of the national newborn population  
31  
32 in terms of geographical distribution and characteristics.  
33 57  
34  
35 58 • The population is restricted to the children assigned to the participating paediatricians,  
36  
37 which might lead to a somewhat selected sample because many of the paediatricians  
38 59  
39 are part of the national Paediatricians' Cultural Association (ACP) and may have  
40 60  
41 joined because they are more inclined to participate in research than others; however,  
42 61  
43 paediatricians do not choose which children will be placed in their care since children  
44 62  
45 they are assigned to them by the local health unit.  
46 63  
47  
48 64 • The newborn population reflects that of the newborn population normally followed by  
49 65  
50 family paediatricians in Italy, but not those with serious health problems who are  
51 66  
52 likely followed, at least in the first period of their lives, by hospital staff or specialists.  
53  
54  
55  
56  
57  
58  
59  
60

1  
2  
3  
4  
5  
6  
7  
8  
9  
10  
11  
12  
13  
14  
15  
16  
17  
18  
19  
20  
21  
22  
23  
24  
25  
26  
27  
28  
29  
30  
31  
32  
33  
34  
35  
36  
37  
38  
39  
40  
41  
42  
43  
44  
45  
46  
47  
48  
49  
50  
51  
52  
53  
54  
55  
56  
57  
58  
59  
60

- 67 • NASCITA does not collect biological samples due to the costs of data collection and  
68 storage and will therefore not be able to evaluate genetic or immunological factors, for  
69 example.

For peer review only



## 91 INTRODUCTION

92 Infancy and childhood are periods of rapid growth and development and contribute  
93 significantly to well-being, health status, and behaviour throughout life.[1] Research carried  
94 out worldwide has shown that many common diseases and challenges in adult life can be  
95 traced back to early childhood and that health and social determinants in early life play a  
96 strong role.[2,3] Specifically, certain social factors, socioeconomic status, living conditions,  
97 parental and stakeholder care, and attitudes influence the well-being of children and lead to  
98 health inequalities among children. In a developed region of the world such as Europe, most  
99 children are healthy, but inequalities between and within member states, lack of access to  
100 quality services, and unhealthy lifestyles negatively affect health in children and adolescents  
101 also in Europe[4] In order to be able to set up the most effective interventions, tailored to  
102 those who would benefit the most, it is important to identify the existing inequalities and  
103 health determinants in specific countries. In Italy, research has been carried out on health  
104 determinants and on their interactions,[5] with similar findings compared to other European  
105 countries.[6] Low socioeconomic status, lower parental education, and employment status  
106 were found to be associated with lower health and development outcomes. Despite complex  
107 interaction between exposure variables found,[7] some determinants, such as promotion of  
108 autonomy in the home environment, were found to play a crucial role in child neurocognitive  
109 development. A 2019 review of inequalities in child health[8] found that behavioural  
110 determinants, however, are not as influential as socioeconomic status and living conditions. It  
111 would be useful to further investigate such influences in Italy. Interactions between health  
112 determinants are complex and also need to be investigated.[8-10]

113 Prospective birth cohort studies are studies that follow a group of newborns for an  
114 extended period of time and permit the collection of accurate information about exposures,  
115 outcomes, and several covariates.[11] Many birth cohorts have been set up worldwide,[12,13]

1  
2  
3 116 some as early as 1921 in Europe,[14] and have contributed to knowledge in numerous areas,  
4  
5 117 from medical to social ones.[15-17]  
6

7  
8 118 Cohort characteristics vary greatly from one cohort to another, as do their objectives,  
9  
10 119 with some cohorts focused on one specific area, such as environmental factors and their effect  
11  
12 120 on health, and others on multiple areas. Some cohorts collect data retrospectively, others  
13  
14 121 prospectively. Some collect only written data, others also biological samples.  
15

16  
17 122 Two reviews of cohorts in Europe have been carried out, one from 2013 that gave a  
18  
19 123 general description of birth and pregnancy cohorts in Europe[12] and the second, from 2020,  
20  
21 124 that gave a more detailed description of cohorts that recruited at birth and not during  
22  
23 125 pregnancy.[18] These reviews showed that many cohorts have been set up in northern and  
24  
25 126 western Europe and that the study areas, and their range, varied greatly. The more recent  
26  
27 127 review[18] showed that many of the cohorts are relatively recent, with half of the 111  
28  
29 128 European cohorts beginning after 2000, and that their methodologies differed significantly.  
30  
31 129 This review also showed that few, relatively recent cohorts focused on family context  
32  
33 130 (nurturing care) and its impact. Nurturing care refers to the environment created by caregivers  
34  
35 131 that is attentive to children's health and nutritional and social needs and has been shown to  
36  
37 132 positively influence children's health, growth, and development.[2] Nurturing care is a central  
38  
39 133 issue;[19] it offers possibilities for interventions to promote maximum health, social, and  
40  
41 134 cognitive development, and should be a priority study area.  
42  
43  
44  
45

46  
47 135 In Italy, the population is becoming more heterogeneous, and sociodemographic and  
48  
49 136 geographic differences, such as education and migrant status, have been associated with  
50  
51 137 health disparities.[20,21] Italy, in fact, has a public, universal healthcare system that should  
52  
53 138 pose no legal or financial barriers to subgroups of the population, but considerable health  
54  
55 139 inequalities exist and arise from differences in health behaviour, exposure, environment,  
56  
57 140 genes, etc.[20] Many of these inequalities are well-known and relate to regional differences,  
58  
59  
60

1  
2  
3 141 with southern Italy often resulting at the greatest disadvantage due to cultural and economic  
4  
5 142 factors.[22]

6  
7 143 Various cohort studies have been carried out in Italy, most with general aims and with  
8  
9 144 data collection limited in time or to specific geographical contexts.[23-31] Nine prospective  
10  
11 145 cohorts have been set up in Italy,[23,26,28-34] starting from 2000, some of which recruited in  
12  
13 146 pregnancy and some at birth. All these cohorts began data collection at recruitment, through  
14  
15 147 clinical visits, questionnaires, in-person or telephone interviews, and medical records. The  
16  
17 148 largest of these cohorts, the NINFEA, recruited participants online. The population sizes of  
18  
19 149 these cohorts ranged from 274-7500. The oldest cohort, the Genetic and Environment:  
20  
21 150 Prospective Study on Infancy in Italy (GASPII), began in 2005, and the newest, the Neonatal  
22  
23 151 Environmental and Health Outcomes (NEHO), in 2018. One cohort, MUBICOS, specifically  
24  
25 152 enrolled twins, and recruited them in eight participating Italian hospitals. The MUBICOS  
26  
27 153 cohort is the only one currently recruiting. Only three of these cohorts aimed to be  
28  
29 154 representative of the Italian geographical context, North, Centre, and South: the NINFEA,  
30  
31 155 ICON, and MUBICOS cohorts.

32  
33 156 The NASCITA study (*NAscere e creSCere in ITAlia*), a longitudinal, prospective,  
34  
35 157 national level, population-based birth cohort, was set up in 2019 to improve the understanding  
36  
37 158 of the early health status of Italian children and how it is affected by social and health  
38  
39 159 determinants, including nurturing care. Like many other cohorts, it addresses multiple  
40  
41 160 research questions.[35,36] The central role of the paediatrician in data collection on overall  
42  
43 161 health and growth and in interaction with patients is a unique quality of NASCITA, however,  
44  
45 162 and is possible in Italy because primary care for children is guaranteed by the family  
46  
47 163 paediatrician, unlike in many other countries.[37] The data will be based on the  
48  
49 164 paediatrician's assessment and diagnosis of health status and outcomes instead of on parental  
50  
51 165 recounting or medical records, leading to more accurate data and avoiding possible cultural  
52  
53  
54  
55  
56  
57  
58  
59  
60

1  
2  
3 166 and socio-demographic influences on data recall.[38] The synergy between the paediatrician's  
4  
5 167 central role and this cohort study's focus on nurturing care make NASCITA different from  
6  
7 168 most Italian and European cohort studies. NASCITA will also be able to collect data from  
8  
9  
10 169 throughout the national context and will therefore be able to better assess the regional  
11  
12 170 differences and disparities in health behaviours and healthcare that exist in Italy.

14 171 The main aim of the NASCITA cohort is to build a national observatory, starting from  
15  
16 172 the paediatricians' office, to evaluate physical, cognitive, and psychological development, and  
17  
18 173 health status and health resource use during the first six years of life in a group of newborns,  
19  
20 174 and to evaluate potentially associated factors. The findings will be used to develop specific  
21  
22 175 prevention measures and interventions to improve the health status of children, contributing to  
23  
24 176 the life-course approach that is being increasingly prioritized world-wide.[39]

28 177 This cohort profile paper describes the rationale behind the NASCITA Cohort, the  
29  
30 178 study design, and characteristics of the population of enrolled newborns, and those of their  
31  
32 179 families. In particular, as region of residence is known to be strongly associated with both  
33  
34 180 healthcare quality and behaviour, geographic differences were analysed.

37  
38 181

## 41 182 **COHORT DESCRIPTION**

44 183 In Italy, health care is provided free or at a minimal charge. Children are assigned to a family  
45  
46 184 paediatrician by the Local Health Unit and receive care from that paediatrician until they are  
47  
48 185 at least six years old. Seven well-child visits are scheduled by the paediatrician in the first six  
49  
50 186 years of a child's life to monitor growth and development and offer preventive care.

53 187 Additional visits are organized when needed. The NASCITA cohort was set up by the  
54  
55 188 Laboratory for Mother and Child Health of the Istituto di Ricerche Farmacologiche Mario  
56  
57 189 Negri IRCCS in Milan in collaboration with the national Paediatric Cultural Association

1  
2  
3 190 (ACP) and was designed to be embedded in Italian paediatric primary care practice. Data are,  
4  
5 191 in fact, collected directly by the paediatrician and mostly during the well-child visits. The  
6  
7 192 study was approved by the Fondazione IRCCS Istituto Neurologico "Carlo Besta" ethics  
8  
9  
10 193 committee on 6 February 2019 (Verbale n 59).

11  
12 194 Paediatrician participation is voluntary and no compensation is given. Recruitment  
13  
14 195 details have been explained previously.[40] Briefly, locally representative paediatricians were  
15  
16 196 identified, initially through the national Paediatric Cultural Association (APC), after which  
17  
18 197 paediatricians identified in each geographic area were asked to identify additional  
19  
20 198 paediatricians from their area for invitation. Other paediatric and scientific societies were also  
21  
22 199 contacted for collaboration. Paediatricians who chose to participate provided initial  
23  
24 200 information, such as contact information and area of residence, through an online form. A  
25  
26 201 total of 139 paediatricians from throughout Italy, representing all geographic areas of the  
27  
28 202 country, agreed to participate.[41] Enrolment took place between April 2019 and July 2020  
29  
30 203 and, within this time frame, each paediatrician enrolled, for a 1-year period, all newborns  
31  
32 204 presenting for their first visit (which routinely takes place in the first 45 days of life in Italy)  
33  
34 205 and whose parents gave informed consent. No other inclusion or exclusion criteria were  
35  
36 206 present for enrolment.

37  
38 207 Only children who were seen by the paediatricians for at least two visits, including the  
39  
40 208 first well-child visit, were considered for the baseline population. Children who had not had a  
41  
42 209 second visit (n. 112) were excluded in order to avoid including those seen by the paediatrician  
43  
44 210 only in a transitory manner. Newborns will be followed-up until they are at least six years old.

45  
46 211 Multiple health outcomes will be studied in the NASCITA Cohort, including the  
47  
48 212 relationship between child development and nurturing care.[40] Nurturing care, which, as  
49  
50 213 mentioned above, refers to those behaviours put in place by parents and caregivers that create  
51  
52 214 an optimal environment for children to thrive, and involves factors to be implemented from  
53  
54  
55  
56  
57  
58  
59  
60

1  
2  
3 215 before pregnancy to the first few months of life and beyond, such as folic acid intake, smoke  
4  
5 216 and alcohol avoidance, and breastfeeding. Specific factors that will be evaluated in this cohort  
6  
7  
8 217 are disease prevention and treatment actions, nutrition (breastfeeding and diet), caregiving  
9  
10 218 routine, home opportunities to explore and learn, parental adherence to the recommendations  
11  
12 219 for better child care and development, and how all these things relate to child growth and  
13  
14 220 development. Some maternal and paternal periconceptual characteristics will also be  
15  
16 221 evaluated, considering their role in offspring health. The influence of geographical settings in  
17  
18 222 educational and socialization opportunities available for young children and in the care  
19  
20 223 provided by the family paediatricians and by the national health service will also be  
21  
22 224 evaluated.

25  
26 225 Paediatricians collected data on the newborns and on parental socio-demographic and  
27  
28 226 lifestyle characteristics such as employment status, educational level, and smoking habits,  
29  
30 227 during the well-child visits held so far through online forms. These forms were created for  
31  
32 228 each of the planned well-child visits, based on the foreseen age range,[40] and were revised  
33  
34 229 by a group of paediatricians and other participants (pharmacists, educators, parents), who  
35  
36 230 make up the technical-scientific committee. The data collected vary as the children grow, with  
37  
38 231 age-appropriate measures (e.g. breastfeeding, neurodevelopmental parameters) and include  
39  
40 232 questions to ask parents during the visits on their habits and parenting behaviours. Most data  
41  
42 233 are already collected by paediatricians using routine data collection forms and checklists.  
43  
44 234 Additional data collected were integrated with validated tools for recording data of particular  
45  
46 235 interest (e.g. the CDC checklist for developmental milestones).[42] An additional form is  
47  
48 236 available online to paediatricians to also collect data during any caregiver-paediatrician  
49  
50 237 telephone contact or extra visits. The children's records can be accessed at any time to  
51  
52 238 complete any missing data. Efforts are being made to reduce the amount of missing  
53  
54 239 information, such as emailing or calling paediatricians and implementing a system that  
55  
56  
57  
58  
59  
60

1  
2  
3 240 notifies the paediatricians about incomplete data. The more technological aspects of the  
4  
5 241 NASCITA study, such as the web portal and online platform for data input and modification,  
6  
7 242 have been described in detail in a separate article.[41]  
8  
9

10 243 Data is continuously being monitored and cleaned, and is analysed periodically. The  
11  
12 244 Kruskal-Wallis test was used to analyse continuous variables, and the chi-squared test was  
13  
14 245 used for the categorical variables. All p-values <0.05 were considered statistically significant  
15  
16 246 and were labelled with an asterisk in the tables. Additional details on the NASCITA Cohort  
17  
18 247 are described in the protocol.[40] The NASCITA study's website is available at  
19  
20  
21 248 <https://coortenascita.marionegri.it>.  
22  
23

24 249

## 250 **FINDINGS TO DATE**

### 251 **Characteristics of study participants**

252 The cohort population consists of 5054 newborns, recruited by 139 paediatricians. The  
253 paediatricians enrolled an average of 76.2% of the newborns assigned to them by the local  
254 health unit.

255 The demographic characteristics of the parents are reported in Table 1. Missing data  
256 were excluded from the percentages in all tables because they were limited to <2,5% for all  
257 the main variables, except maternal pregnancy body mass index (BMI) (limited to <5%). The  
258 mean age of the mothers at delivery was 33.1 years (median 33). If only primiparas are  
259 considered, average maternal age was 32.3 years (range 16-54 years). The majority of  
260 mothers and fathers were born in Italy (86.6% and 88.7%, respectively). A higher rate of both  
261 parents born abroad was found for families in the North compared to the South of Italy.  
262 Mothers tended to have a high or medium level of education (42.5% had a university degree  
263 and 41.7 a high school degree), and to be employed (69.7%). Fewer fathers had a high level

264 of education (26.7% university degree), but the majority were employed (96.1%). In general,  
 265 there were higher levels of maternal and paternal education in the Centre, and lower levels of  
 266 maternal and paternal employment in the South.

267

268 **Table 1. Maternal and paternal characteristics**

|                                               | Total<br>n (%) | North<br>n (%) | Centre<br>n (%) | South<br>n (%) | P value  |
|-----------------------------------------------|----------------|----------------|-----------------|----------------|----------|
| Average maternal age at delivery, yrs; SD     | 33.1; 5.4      | 32.9; 5.2      | 33.7; 5.3       | 32.9; 5.6      | 0.0005*  |
| Median maternal age at delivery, yrs; min-max | 33; 16-54      | 33.0; 18-51    | 34; 17-54       | 33; 16-51      |          |
| Maternal age class at delivery, yrs           |                |                |                 |                | 0.0034*  |
| <25                                           | 306 (6.2)      | 142 (6.1)      | 46 (4.8)        | 118 (7.1)      |          |
| 25-29                                         | 900 (18.2)     | 436 (18.9)     | 136 (14.3)      | 328 (19.7)     |          |
| 30-34                                         | 1771 (35.9)    | 836 (36.2)     | 353 (37.0)      | 582 (34.9)     |          |
| 35-39                                         | 1438 (29.2)    | 667 (28.9)     | 309 (32.4)      | 462 (27.7)     |          |
| 40+                                           | 518 (10.5)     | 229 (9.9)      | 110 (11.5)      | 179 (10.7)     |          |
| Mother born in Italy                          | 4357 (86.6)    | 1894 (81.1)    | 837 (86.5)      | 1626 (93.9)    | <0.0001* |
| Father born in Italy                          | 4437 (88.7)    | 1950 (83.9)    | 841 (87.5)      | 1646 (95.8)    | <0.0001* |
| Both parents born abroad                      | 430 (8.6)      | 305 (13.1)     | 87 (9.1)        | 38 (2.2)       | <0.0001* |
| Maternal education                            |                |                |                 |                | <0.0001* |
| Elementary/Middle school                      | 971 (15.8)     | 365 (15.8)     | 95 (9.8)        | 331 (19.4)     |          |
| Highschool                                    | 2082 (41.7)    | 1020 (44.0)    | 337 (34.9)      | 725 (42.4)     |          |
| University                                    | 2123 (42.5)    | 933 (40.3)     | 535 (55.3)      | 655 (38.3)     |          |
| Maternal employment                           | 3496 (69.7)    | 1740 (74.8)    | 747 (76.5)      | 1009 (58.8)    | <0.0001* |
| Paternal education                            |                |                |                 |                | <0.0001* |
| Elementary/Middle school                      | 1155 (23.3)    | 547 (23.7)     | 137 (14.3)      | 471 (27.8)     |          |
| Highschool                                    | 2471 (50.0)    | 1191 (51.8)    | 454 (47.5)      | 826 (48.8)     |          |
| University                                    | 1319 (26.7)    | 561 (24.4)     | 364 (38.1)      | 394 (23.3)     |          |
| Paternal employment                           | 4796 (96.1)    | 2281 (98.4)    | 929 (96.2)      | 1586 (93.1)    | <0.0001* |
| Maternal civil status                         |                |                |                 |                | <0.0001* |
| Married/living together                       | 4772 (95.7)    | 2222 (96.0)    | 897 (93.0)      | 1653 (96.9)    |          |
| Single/separated/divorced/widow               | 213 (4.3)      | 92 (4.0)       | 68 (7.0)        | 53 (3.1)       |          |
| Child living with both parents                | 4949 (98.2)    | 2305 (98.6)    | 957 (98.0)      | 1687 (97.6)    | 0.0550   |

269

270

271 Many mothers (19.2%) had a chronic disease, such as hyper- or hypothyroidism, or asthma  
 272 (40.1% and 10.2% of mothers with a chronic disease, respectively) (Table 2). The presence of  
 273 chronic diseases in the mothers, and in the families in general, was more frequent in southern  
 274 Italy.

275

276

277 **Table 2. Pregnancy characteristics**

|  | North<br>n (%) | Centre<br>n (%) | South<br>n (%) | Total<br>n (%) | P value |
|--|----------------|-----------------|----------------|----------------|---------|
|--|----------------|-----------------|----------------|----------------|---------|



|                                                 |              |            |              |              |           |
|-------------------------------------------------|--------------|------------|--------------|--------------|-----------|
| Natural conception                              | 2204 (94.4)  | 912 (93.2) | 1594 (94.7)  | 4710 (94.2)  | 0.229     |
| Parity: Primiparous                             | 1235 (53.0)  | 594 (60.9) | 962 (55.6)   | 2791 (55.4)  | 0.0002 *  |
| No previous pregnancies ( <i>primigravida</i> ) | 1033 (44.3)  | 477 (49.0) | 824 (47.8)   | 2334 (46.4)  | 0.0180 *  |
| <i>n</i> previous pregnancies (2697 women)      |              |            |              |              | 0.0986    |
| 1                                               | 708 (54.8)   | 285 (58.0) | 467 (52.6)   | 1460 (54.7)  |           |
| 2                                               | 389 (30.1)   | 151 (30.8) | 274 (30.9)   | 814 (30.5)   |           |
| >2                                              | 195 (15.1)   | 55 (11.2)  | 146 (16.5)   | 396 (14.8)   |           |
| Pre-pregnancy BMI                               |              |            |              |              | <0.0001 * |
| Underweight                                     | 208 (9.3)    | 80 (8.6)   | 94 (5.6)     | 382 (7.9)    |           |
| Normal weight                                   | 1.489 (66.5) | 653 (70.2) | 1.098 (65.4) | 3.240 (66.8) |           |
| Overweight                                      | 362 (16.2)   | 145 (15.6) | 339 (20.2)   | 846 (17.5)   |           |
| Obese                                           | 179 (8.0)    | 52 (5.6)   | 149 (8.9)    | 380 (7.8)    |           |
| Gestational weight gain                         |              |            |              |              | 0.3498    |
| Inadequate                                      | 804 (36.2)   | 344 (37.1) | 609 (36.7)   | 1.757 (36.6) |           |
| Optimal                                         | 876 (39.5)   | 378 (40.8) | 628 (37.9)   | 1.882 (39.2) |           |
| Excessive                                       | 538 (24.3)   | 204 (22.0) | 422 (25.4)   | 1.164 (24.2) |           |
| Healthy pregnancy                               | 1992 (85.2)  | 839 (85.9) | 1497 (86.5)  | 4328 (85.8)  | 0.4839    |
| Chronic disease in mother                       | 397 (17.0)   | 188 (19.2) | 387 (22.3)   | 972 (19.2)   | 0.0001 *  |
| Folic acid taken appropriately*                 | 910 (39.5)   | 400 (41.0) | 496 (28.6)   | 1806 (36.1)  | <0.0001 * |
| Vaccination in pregnancy                        | 1121 (49.1)  | 278 (28.9) | 229 (13.4)   | 1628 (32.8)  | <0.0001 * |
| Recommended vaccines                            |              |            |              |              |           |
| DTaP                                            | 1076 (46.0)  | 267 (27.2) | 199 (11.5)   | 1542 (30.5)  | <0.0001 * |
| Influenza                                       | 239 (10.2)   | 89 (9.1)   | 73 (4.2)     | 401 (7.9)    | <0.0001 * |
| Any smoke during pregnancy                      | 163 (7.0)    | 64 (6.7)   | 97 (5.7)     | 324 (6.5)    | 0.2238    |
| Occasionally                                    | 58 (36.0)    | 22 (34.4)  | 36 (37.5)    | 116 (36.1)   |           |
| Daily                                           | 103 (64.0)   | 42 (65.6)  | 60 (62.5)    | 205 (63.9)   |           |
| If DAILY, how much                              |              |            |              |              |           |
| Little ( $\leq 10$ /day)                        | 91 (88.3)    | 38 (90.5)  | 49 (81.7)    | 178 (86.8)   | 0.4055    |
| Moderate (11-19/day)                            | 10 (9.7)     | 2 (4.8)    | 9 (15.0)     | 21 (10.2)    |           |
| A lot (1 pack/day)                              | 2 (1.9)      | 2 (4.8)    | 2 (3.3)      | 6 (2.9)      |           |
| Any alcohol during pregnancy                    | 335 (14.8)   | 63 (6.6)   | 96 (5.6)     | 494 (10.0)   |           |
| Occasionally                                    | 325 (97.0)   | 61 (96.8)  | 94 (97.9)    | 480 (97.2)   | 0.9208    |
| Daily                                           | 10 (3.0)     | 2 (3.2)    | 2 (2.1)      | 14 (2.8)     |           |

\* Folic acid supplementation was considered appropriate if folic acid was taken from at least one month before, and throughout, at least the first trimester of pregnancy. It was classified as "inappropriate" if folic acid was taken only once the pregnancy began, even if throughout the pregnancy, or if it was taken, but data were missing as to how and when.

## 282 Pregnancy

283 The pregnancy characteristics, reported in Table 2, revealed a 94.2% rate of natural  
 284 conception. In all, 14.2% of mothers had a gestational disorder, in 35.0% of whom it was  
 285 gestational diabetes. Concerning maternal behaviours in pregnancy, folic acid  
 286 supplementation was often inappropriate (3043 mothers, 60.8%), or not present at all (160,  
 287 3.2%), and vaccination rates in pregnancy were low (1628, 32.8%), involving mostly DTaP  
 288 (94.8%). In terms of geographical differences, there were lower rates of proper folic acid  
 289 supplementation and vaccination in the South. A total of 324 (6.5%) mothers smoked during  
 290 pregnancy, 63.9% of whom smoked daily. Alcohol was consumed by 494 (10.0%) mothers,  
 291 14 of whom drank it on a daily basis. The rate of alcohol consumption during pregnancy was  
 292 higher in the North. Maternal pre-pregnancy BMI showed that one fourth (25.3%) of mothers

1  
2  
3 293 was overweight or obese, with a higher in southern Italy compared to the North and Centre. In  
4  
5 294 general, one fourth of mothers (24.2%) gained an amount of weight greater than that  
6  
7 295 recommended by the US Institute of Medicine (IOM).  
8  
9

10 296

## 11 12 297 **Delivery**

13  
14 298 Concerning the birth characteristics (Table 3), almost all births were in-hospital (4980,  
15  
16 299 98.8%), 4895 (97.1%) were singleton births, and 1600 (31.7%) were caesarean births.  
17  
18 300 Hospitals provided skin to skin contact in three fourths of cases (3676, 73.8%), provided  
19  
20 301 intramuscular vitamin K prophylaxis at birth (4644, 92.9%), and gave newborns artificial  
21  
22 302 milk (1987, 40.1%), sugared water (215, 4.3%), or water (17, 0.3%). The rate of exclusive  
23  
24 303 breastfeeding at discharge was 69.6% (3509 mothers). In terms of national-level differences,  
25  
26 304 in the South caesarean births were more common, and rates of use of formula milk and  
27  
28 305 sugared water during hospital stay were higher. The rate of exclusive breastfeeding at  
29  
30 306 discharge was lower in the South (62.1% compared to 73.7% and 72.8% in the North and  
31  
32 307 Centre, respectively).  
33  
34  
35  
36  
37  
38  
39

## 40 309 **Newborns**

41  
42 310 Table 3 reports the newborns' characteristics. In all, 2474 (48.9%) were female. Birthweight  
43  
44 311 ranged from 635 to 5885 grams (median 3270 grams), with 294 (5.8%) low birthweight  
45  
46 312 (<2500 grams) newborns and 234 (4.6%) weighing >4000 grams. A total of 315 (6.2%)  
47  
48 313 newborns were born prematurely (22-36 weeks gestational age (GA)), five (1.6%) of whom  
49  
50 314 were extremely preterm (<28 weeks GA). Concerning weight and GA, 525 (10.5%) infants  
51  
52 315 were small for gestational age (SGA) and 452 (9.0%) were large for gestational age (LGA),  
53  
54  
55  
56 316 Italian Neonatal Study (INeS) charts.[43]  
57  
58  
59  
60

317 In all, 161 (3.2%) newborns needed resuscitation at birth, 161 (3.2%) were born with  
 318 birth defects, and 398 (7.9%) were born with a neonatal disease. The most common diseases  
 319 were jaundice (106 newborns), respiratory distress (59), and neonatal hypoglycaemia (47).  
 320 Furthermore, 16.5% of newborns had to be admitted to a neonatal care ward and 4.3% to a  
 321 neonatal intensive care unit.

322  
 323 **Table 3. Delivery, in-hospital, breast feeding, and newborn characteristics**

|                                               | <i>North<br/>n (%)</i> | <i>Centre<br/>n (%)</i> | <i>South<br/>n (%)</i> | <i>Total<br/>n (%)</i> | <i>P value</i> |
|-----------------------------------------------|------------------------|-------------------------|------------------------|------------------------|----------------|
| Mean gestational age at birth, wks; SD        | 39.0; 1.7              | 39.0; 1.6               | 38.9; 1.8              | 39.0; 1.7              | 0.0158 *       |
| Gestational age category (weeks)              |                        |                         |                        |                        | 0.0009 *       |
| 22-36                                         | 124 (5.3)              | 50 (5.1)                | 141 (8.1)              | 315 (6.2)              |                |
| 37-41                                         | 2197 (93.9)            | 923 (94.3)              | 1571 (90.8)            | 4691 (92.9)            |                |
| 42-44                                         | 18 (0.8)               | 6 (0.6)                 | 19 (1.1)               | 43 (0.9)               |                |
| Birth in hospital                             | 2323 (99.4)            | 966 (98.9)              | 1691 (98.0)            | 4980 (98.8)            | 0.0003 *       |
| Single vs twin births                         |                        |                         |                        |                        | <0.0001 *      |
| Single birth                                  | 2294 (98.2)            | 954 (97.5)              | 1647 (95.3)            | 4895 (97.1)            |                |
| Twins                                         | 42 (1.8)               | 23 (2.4)                | 82 (4.7)               | 147 (2.9)              |                |
| Birth type                                    |                        |                         |                        |                        | <0.0001 *      |
| Spontaneous                                   | 1639 (70.0)            | 608 (62.1)              | 993 (57.3)             | 3240 (64.1)            |                |
| Caesarean                                     | 575 (24.6)             | 328 (33.5)              | 697 (40.2)             | 1600 (31.7)            |                |
| Instrumental birth                            | 126 (5.4)              | 43 (4.4)                | 44 (2.5)               | 213 (4.2)              |                |
| Skin to skin contact immediately after birth  | 1880 (82.1)            | 778 (80.1)              | 1018 (59.2)            | 3676 (73.8)            | <0.0001 *      |
| Intramuscular Vitamin K at birth              | 2204 (95.2)            | 940 (96.7)              | 1500 (87.7)            | 4644 (92.9)            | <0.0001 *      |
| Breast feeding in hospital                    | 2098 (91.4)            | 906 (93.0)              | 1476 (87.7)            | 4480 (90.5)            | <0.0001 *      |
| Exclusively breastfed upon hospital discharge | 1720 (73.7)            | 713 (72.8)              | 1076 (62.1)            | 3509 (69.6)            | <0.0001 *      |
| <b>NEWBORNS</b>                               |                        |                         |                        |                        |                |
| Female                                        | 1116 (47.7)            | 515 (52.6)              | 843 (48.6)             | 2474 (49.0)            | 0.0361 *       |
| Mean birthweight, gr; SD                      | 3278.0; 483.8          | 3250.3; 487.5           | 3225.8; 501.4          | 3254.7; 491.1          | 0.0055 *       |
| Median birthweight, gr; min-max               | 3290.0; 635 - 4850     | 3250.0; 1155 - 4750     | 3250.0; 1160 - 5885    | 3270.0; 635.0 - 5885.0 |                |
| Birthweight class, gr                         |                        |                         |                        |                        | 0.0589         |
| <2.500                                        | 124 (5.3)              | 53 (5.4)                | 117 (6.8)              | 294 (5.8)              |                |
| 2.500-4.000                                   | 2098 (89.7)            | 874 (89.3)              | 1552 (89.6)            | 4524 (89.5)            |                |
| >4.000                                        | 118 (5.0)              | 52 (5.3)                | 64 (3.7)               | 234 (4.6)              |                |
| Weight for gestational age                    |                        |                         |                        |                        | 0.8335         |
| Small for gestational age (SGA)               | 236 (10.1)             | 97 (10.0)               | 192 (11.2)             | 525 (10.5)             |                |
| Appropriate for gestational age (AGA)         | 1884 (80.9)            | 785 (80.8)              | 1373 (79.9)            | 4042 (80.5)            |                |
| Large for gestational age (LGA)               | 210 (9.0)              | 89 (9.2)                | 153 (8.9)              | 452 (9.0)              |                |
| Mean length, cm; SD                           | 49.7; 2.5              | 49.8; 2.3               | 49.5; 2.4              | 49.6; 2.4              | 0.0018 *       |
| Malformation at birth                         | 80 (3.4)               | 28 (2.9)                | 53 (3.1)               | 161 (3.2)              | 0.6565         |
| Disease at birth                              | 172 (7.4)              | 77 (7.9)                | 149 (8.6)              | 398 (7.9)              | 0.3466         |
| Admitted to Neonatal Unit                     | 398 (17.4)             | 181 (18.7)              | 241 (14.0)             | 820 (16.5)             | 0.0019 *       |
| Admitted to Neonatal Intensive Care Unit      | 84 (3.6)               | 34 (3.5)                | 97 (5.6)               | 215 (4.3)              | 0.0030 *       |

324

325 **First visit with the family paediatrician**

326 The average age of the newborns at their first out-of-hospital visit was 25.7 days, with a  
 327 median of 24.9 days (Table 4). A total of 3187 (63.6%) newborns were being exclusively  
 328 breastfed at the time of their first visit, while, of the remaining newborns, over one third  
 329 (35.9%) were receiving formula milk and two thirds (64.1%) were receiving a mixed feeding  
 330 regimen.

331

332 **Table 4. Characteristics at first visit with paediatrician (7-45 days old)**

|                                                     | <i>North<br/>n (%)</i> | <i>Centre<br/>n (%)</i> | <i>South<br/>n (%)</i> | <i>Total<br/>n (%)</i> | <i>P value</i> |
|-----------------------------------------------------|------------------------|-------------------------|------------------------|------------------------|----------------|
| Breast feeding                                      |                        |                         |                        |                        | < 0.0001 *     |
| Exclusive                                           | 1577 (67.9)            | 639 (65.5)              | 971 (56.7)             | 3187 (63.6)            |                |
| Mixed breast feeding                                | 476 (20.4)             | 252 (25.8)              | 440 (25.6)             | 1168 (23.3)            |                |
| Artificial formula only                             | 270 (11.6)             | 84 (8.6)                | 300 (17.5)             | 654 (13.1)             |                |
| Usual sleep position                                |                        |                         |                        |                        | <0.0001 *      |
| Supine                                              | 2069 (90.3)            | 849 (87.3)              | 1444 (84.5)            | 4362 (87.7)            |                |
| Side                                                | 92 (4.0)               | 65 (6.7)                | 215 (12.6)             | 372 (7.5)              |                |
| Prone                                               | 130 (5.7)              | 59 (6.1)                | 50 (2.9)               | 239 (4.8)              |                |
| Vitamin D prophylaxis<br>ongoing/initiated at visit | 2.297 (98.7)           | 942 (96.3)              | 1.642 (95.6)           | 4881 (97.4)            | <0.0001 *      |
| Drug prescribed at visit (excluding<br>vitamin D)   | 108 (4.6)              | 27 (2.8)                | 41 (2.4)               | 176 (3.5)              | <0.0001 *      |

333

334

335 The prevalence of exclusive breastfeeding at the first well-child visit decreased from  
 336 North to South ( $\chi^2_{1} 52$ ;  $p < 0.001$ ). In the South of Italy, 17.5% of newborns received only  
 337 formula, versus 11.6% in the North and 8.6% in the Centre.

338 Concerning sleeping position, the majority of newborns slept in the supine position  
 339 (87.7%), while 4.8% slept in the prone position. There were geographical differences in  
 340 sleeping position as well: the percentage of supine position was higher in the North (90.3%)  
 341 and lower in the South (84.5%) ( $\chi^2_{1} 31.2$ ;  $p < 0.001$ ).

342 Concerning prophylaxis, 97.4% were receiving vitamin D prophylaxis at their first  
 343 visit. A total of 176 (3.5%) newborns received a drug prescription during their visit and the  
 344 drugs most commonly prescribed were simethicone (17%), nystatin (14%), and ophthalmic  
 345 tobramycin (10%).

346 The results of the screening procedures for normal development (Table 4) show that  
 347 most of the newborns had positive developmental assessment results. Very few were found to  
 348 have problems with motor (9 newborns) or sensory and social (7) skills.

349 The distribution of the cohort population reflects that of the Italian population, based  
 350 on the ISTAT data from 2019,[44] which report that 46% of the national population resides in  
 351 the North, 20% in the Centre, and 34% in the South/islands. The socio-demographic  
 352 characteristics of the mothers also reflect national level data, where the mothers' average age  
 353 at birth of the first child is 32.1 years, as reported in the 2019 Eurostat data for Italy,[45]  
 354 compared to 32.3 in the NASCITA cohort. The main characteristics at birth of mothers and  
 355 newborns in the NASCITA cohort and in the national reference data, the Ministry of Health's  
 356 Certificato di assistenza al parto (CeDAP) 2019 data,[46] are listed in Table 5. The maternal  
 357 level of education is higher in NASCITA compared to national level data (42.5% compared to  
 358 31.2% of mothers have a university degree),[46] while the percentage of foreign-born mothers  
 359 on the other hand, is lower in NASCITA (13.4% vs 21%), with both results likely to be due to  
 360 language barriers that preclude recruitment and to the more frequent transfers to other  
 361 areas/paediatricians on the part of families with parents who were born abroad. These  
 362 differences are also true when NASCITA cohort data are compared with those of the Italian  
 363 NINFEA[28] and PiccoliPiù[47] cohorts, i.e., the general population characteristics are  
 364 similar, while the maternal level of education is higher in NASCITA and the percentage of  
 365 foreign-born parents is lower. The distribution of the newborns' anthropometric measures is  
 366 also comparable with that of the national data.[48]

367

368 **Table 5. Main characteristics at birth of mothers and newborns in the NASCITA cohort**  
 369 **and in the national reference data (CeDAP)**

|                      | <i>NASCITA</i><br>% population | <i>CeDAP</i><br>% population |
|----------------------|--------------------------------|------------------------------|
| MOTHERS              |                                |                              |
| Mother born in Italy | 86.6                           | 79                           |
| Mother's age, yrs    |                                |                              |

|                                             |      |      |
|---------------------------------------------|------|------|
| ≤29                                         | 24.4 | 25.3 |
| 30-39                                       | 65.1 | 63.5 |
| 40+                                         | 10.5 | 11.2 |
| Maternal education                          |      |      |
| Elementary/Middle school                    | 23.3 | 25.9 |
| Highschool                                  | 50.0 | 42.9 |
| University                                  | 42.5 | 31.2 |
| Maternal employment                         | 69.7 | 55.0 |
| Healthy pregnancy                           | 85.8 | 85.2 |
| Natural conception                          | 94.2 | 96.9 |
| Caesarean section                           | 31.7 | 31.8 |
| NEWBORNS                                    |      |      |
| Twins                                       | 2.9  | 1.6  |
| Birthweight                                 |      |      |
| <1500 gr                                    | 0.5  | 0.9  |
| 1500-2499 gr                                | 5.3  | 6.2  |
| 2500-3999 gr                                | 89.5 | 87.6 |
| >4000 gr                                    | 4.6  | 5.2  |
| Gestational age at birth /<br>Preterm birth |      |      |
| 22-36 weeks                                 | 6.2  | 6.8  |
| 37-41                                       | 92.9 | 92.7 |
| >41                                         | 0.9  | 0.5  |
| Malformation at birth                       | 3.2  | 1.3  |

370

371

372 Newborns participating in the NASCITA cohort, and their families, are generally

373 representative of the Italian population in terms of geographical distribution[41] and

374 sociodemographic characteristics, with the exception of the lower prevalence of foreign-born

375 mothers, as reported above. The analysis of the characteristics during pregnancy and at birth

376 confirms the existence of large geographical differences in attitudes, in particular concerning

377 folic acid intake, immunization, caesarean birth, and exclusive breastfeeding prevalence.

378 One fourth of the NASCITA cohort mothers (25.3%) were overweight or obese,

379 although this rate seems to be lower than the European rate of 30%-50%.[49] The rate of

380 caesarean births in the NASCITA cohort, involving almost one in three births, confirms

381 Italy's standing as one of the countries with the highest rate in Europe. Large regional

382 differences exist, with much higher rates in the South.[50]

383 Concerning aspects related to nurturing care and good practices, the data collected on

384 these behaviours show that more must be done. When considering exclusive breastfeeding,

385 for example, the rates in Italy at hospital discharge were already low, represented by just over

60

1  
2  
3 386 two thirds of mothers (69.6%), and the rate decreased to 63.6% at the first visit with the  
4  
5 387 paediatrician. Concerning folic acid supplementation, only about one third of mothers took it  
6  
7 388 in an appropriate manner, with an even worse situation in the South. Concerning smoking and  
8  
9 389 alcohol use, the NASCITA data showed that 6.5% of mothers continued to smoke during  
10  
11 390 pregnancy and that one in ten drank alcohol during pregnancy.  
12  
13

14 391 Geographical differences in the health status and in the care of mother and newborns  
15  
16 392 are striking, in particular when looking southern Italy. Pregnant women living in southern  
17  
18 393 Italy were less compliant with folic acid prophylaxis and with recommended vaccinations.  
19  
20 394 They were also at greater risk of being overweight or obese at the beginning of the pregnancy.  
21  
22 395 A greater rate of caesarean delivery was reported, neonates were less frequently exposed to  
23  
24 396 skin-to-skin contact with their mothers at birth, and were less likely to be breastfed at  
25  
26 397 discharge from the hospital, and consequently, also at the first well-child visit. Differences in  
27  
28 398 the exclusive breastfeeding rate at hospital discharge after delivery between the South and  
29  
30 399 other geographic areas of Italy persist also when excluding preterm or low birthweight  
31  
32 400 newborns, or newborns with congenital malformations (data not shown). Geographical  
33  
34 401 differences have been already documented by previous studies[20,36] and according to our  
35  
36 402 findings, little has changed in the meantime. Several factors can be associated with these  
37  
38 403 differences (organisation of the healthcare system at the local level, physicians' attitudes, and  
39  
40 404 cultural and socioeconomic factors), and multifaceted interventions are needed. Even after  
41  
42 405 adjusting for sociodemographic variables (e.g. maternal age at delivery, educational level,  
43  
44 406 employment status, Italian nationality, parity, etc.) compliance with good practices remained  
45  
46 407 low in southern Italy (data not shown). Differences in socioeconomic status may have a role,  
47  
48 408 but other variables are likely involved. Moreover, the fact that the exclusive breastfeeding rate  
49  
50 409 at hospital discharge was 62.1% may suggest that there is a need for educational interventions  
51  
52  
53  
54  
55  
56  
57  
58  
59  
60

1  
2  
3 410 for health professionals involved in assistance at delivery and for organisational changes with  
4  
5 411 the aim to support mothers who desire to breastfeed.  
6  
7

8 412

9  
10 413 **Strengths and limitations**

11  
12 414 The NASCITA study confirms what is known about national level and regional level  
13  
14 415 differences in health care practices and behaviours from other studies, such as smoking and  
15  
16 416 alcohol data, but it is also the first study capable of assessing, at the national and regional  
17  
18 417 levels, other variables such as pertussis vaccination in pregnancy. Furthermore, the NASCITA  
19  
20 418 cohort is one of the few studies involving the paediatricians directly as protagonists in cohort  
21  
22 419 design and data collection. The paediatricians' direct role in data collection is a major strength  
23  
24 420 in that it permits a "holistic" evaluation, including information on growth, health status, drug  
25  
26 421 prescriptions, diagnostic exams and specialist visits, data from clinical examinations, and  
27  
28 422 screenings integrated with information obtained from the parents. Another strength of this  
29  
30 423 study is that the newborn population is representative of the national newborn population in  
31  
32 424 terms of geographical distribution and characteristics. Furthermore, strategies were  
33  
34 425 implemented to maintain paediatrician participation and to minimize loss to follow-up,[41]  
35  
36 426 involving, for example, maintaining contact with the paediatricians through periodic emails  
37  
38 427 providing updates on the progress of the cohort, providing paediatricians with timely email  
39  
40 428 assistance with data input, and sending periodic newsletters listing recent publications on  
41  
42 429 other cohort studies. Similarly, strategies were implemented to maintain parental participation  
43  
44 430 and minimize loss to follow-up of the newborns, such as providing information dedicated to  
45  
46 431 parents on the NASCITA study's web portal on common childhood diseases. A further  
47  
48 432 strength of the NASCITA study is that efforts were made to retrospectively collect data on the  
49  
50 433 mothers and fathers from before, and during, the pregnancy.  
51  
52  
53  
54  
55  
56  
57  
58  
59  
60



1  
2  
3 434 The limitations of this study are, first, that the population is restricted to the children  
4  
5 435 assigned to the participating paediatricians, and this may lead to a somewhat selected sample  
6  
7 436 because many of the paediatricians are part of the national Paediatricians' Cultural  
8  
9 437 Association (ACP) and may have joined NASCITA because they are more inclined to  
10  
11 438 participate in research than others. The geographic distribution of the paediatricians, however,  
12  
13 439 is representative of Italy's North-Centre-South division, and the paediatricians do not choose  
14  
15 440 which children to follow, but receive those assigned to them by the local health unit.

16  
17  
18  
19  
20 441 A second limitation is that the newborn population reflects that of the newborn population  
21  
22 442 normally followed by family paediatricians in Italy, which includes all newborns who do not  
23  
24 443 have serious health problems that would prevent them from being regularly followed, at least  
25  
26 444 in the first period of their lives, by a family paediatrician. Newborns with serious health  
27  
28 445 problems are usually followed by hospital staff or specialists, and would therefore not likely  
29  
30 446 have been taken to the first well-child visit within the first 45 days of life (when paediatricians  
31  
32 447 enrolled newborns in the study).

33  
34  
35  
36 448 A third limit of the NASCITA cohort is that it does not collect biological samples due to the  
37  
38 449 costs of data collection and storage. It will therefore not be able to evaluate genetic or  
39  
40 450 immunological factors, for example. Resources and efforts were utilized, however, to achieve  
41  
42 451 the largest population size possible in order to have enough power to study common child  
43  
44 452 exposures and outcomes.

45  
46  
47  
48 453

## 49 50 454 **PATIENT AND PUBLIC INVOLVEMENT**

51  
52 455 Patients were indirectly involved in the development of the research questions and  
53  
54 456 questionnaires in that the technical-scientific committee that was set up to supervise the study,  
55  
56 457 and that collaborates in creating and revising the questionnaires, involves professionals (e.g.,  
57  
58 458 paediatricians, pharmacists, educators) who are also parents. The public is involved through

1  
2  
3 459 the dissemination of cohort results and information on childhood diseases or conditions to  
4  
5 460 parents and the general public on the study's website.  
6  
7  
8 461

## 9 10 462 **COLLABORATION**

11  
12 463 Data from the NASCITA study will be available upon reasonable request, after approval by  
13  
14 464 NASCITA's technical-scientific committee, and for non-commercial purposes. We encourage  
15  
16  
17 465 collaboration between different cohorts, for example to merge, or compare, data on chosen  
18  
19 466 topics of study.  
20  
21  
22 467

23  
24 468

## 25 26 469 **Competing interests**

27  
28 470 None declared.  
29

## 30 31 471 **Funding**

32  
33 472 This work was supported by resources from the Laboratory for Mother and Child Health and  
34  
35 473 by an economic contribution by the *Associazione Amici del Mario Negri* (Grant number:  
36  
37 474 N/A). The *Associazione Amici del Mario Negri* had no role in the design and conduct of the  
38  
39  
40 475 study.  
41

## 42 476 **Patient consent for publication**

43  
44 477 Not required.  
45  
46

## 47 478 **Ethics approval and consent to participate**

48  
49 479 Newborns were enrolled only if parental consent was given. The study was approved by the  
50  
51 480 Fondazione IRCCS Istituto Neurologico "Carlo Besta" ethics committee on 6 February 2019  
52  
53 481 (Verbale n 59).  
54  
55

## 56 482 **Provenance and peer review**

57  
58 483 Not commissioned; externally peer reviewed.  
59  
60

1  
2  
3 484 **Data availability statement**  
4

5 485 The datasets used and/or analysed during the current study are available from the  
6  
7 486 corresponding author upon reasonable request and approval by the technical-scientific  
8  
9 487 committee, and only for non-commercial purposes.  
10  
11

12 488 **Orcid ID**  
13

14 489 Chiara Pandolfini <https://orcid.org/0000-0001-9809-2991>  
15  
16

17 490 **Contributors**  
18

19 491 MB designed the Study. MB and AC directed the study's implementation. AC and MC  
20  
21 492 designed the analytical strategy. MC and RC carried out the statistical analyses. AC, MC, RC,  
22  
23 493 and CP helped to interpret the findings. CP drafted the manuscript. MB, AC, MC, RC, and CP  
24  
25 494 contributed to, and revised, the article., MB, AC, MC, RC, and CP read and approved the  
26  
27 495 final manuscript, and agree to be accountable for all aspects of the work.  
28  
29

30 496 **Acknowledgements**  
31  
32

33 497 The authors would like to thank Claudia Pansieri for her collaboration in setting up and  
34  
35 498 running the NASCITA Cohort, Michele Zanetti for the informatics aspects of the setting up  
36  
37 499 and running of the cohort and its website, and Maria Grazia Calati and Daniela Miglio for  
38  
39 500 assistance in management of the cohort and in communication with the paediatricians.  
40  
41

42  
43 501 Collaborating author names: **Scientific Committee:** Antonio Addis, Renata Bortolus,  
44  
45 502 Annalisa Campomori, Sergio Cattani, Luca De Fiore, Federico Marchetti, Cristiana Piloni,  
46  
47 503 Valeria Renzetti, Chiara Segré, Giorgio Tamburlini. **Research area-specific expert**  
48  
49 504 **collaborators:** Rosario Cavallo, Sergio Conti Nibali, Stefania Manetti, Gherardo Rapisardi,  
50  
51 505 Giacomo Toffol. **Local-level coordinators:** Vicenza Briscioli, Carla Cafaro, Cristoforo  
52  
53 506 Cocchiara, Isodiana Crupi, Patrizia Del Balzo, Laura Dell'edera, Chiara Di Francesco,  
54  
55 507 Alberto Ferrando, Francesca Grassa, Chiara Guidoni, Stefania Manetti, Claudio Mangialavori,  
56  
57 508 Stefano Marinoni, Francesca Marongiu, Fausta Matera, Paolo Moretti, Laura Olimpi, Angela  
58  
59  
60

- 1  
2  
3 509 Pasinato, Ilaria Porro, Ippolita Roncoroni, Raffaella Schiro', Patrizia Seppia, Federica  
4  
5 510 Zanetto. **Participating paediatricians:** Anna Aloisio, Elisabetta Anedda, Giuliana Apuzzo,  
6  
7 511 Giovanna Argo, Anna Armenio, Emanuela Ballerini, Monica Benedetti, Daniela Bertoli,  
8  
9 512 Stefano Bollettini, Chiara Bottalico, Aurora Bottiglieri, Vincenza Briscioli, Antonella Bruno,  
10  
11 513 Laura Brusadin, Mariantonietta Caiazzo, Patrizia Calamita, Miriana Callegari, Rosaria  
12  
13 514 Cambria, Rossella Claudia Cannavò, Maria Cristina Cantù, Domenico Capomolla, Anna  
14  
15 515 Caracciolo, Maria Concetta Carbone, Valeria Carraro, Gaetano Carrassi, Maria Laura  
16  
17 516 Cartiglia, Sara Casagrande, Ornella Castiglione, Rosario Salvatore Cavallo, Teresa Cazzato,  
18  
19 517 Maria Angela Cazzuffi, Melania Maria Giuseppina Cera, Jennifer Chiarolanza, Rosaria  
20  
21 518 China, Nicoletta Cimadamore, Roberto Cionini\*, Cristina Ciuffo, Cristoforo Cocchiara,  
22  
23 519 Damiano Colazzo, Sergio Conti Nibali, Anna Maria Costantini, Claudio Cravidì, Marialuisa  
24  
25 520 Criscione, Isodiana Crupi, Rita D'Agostino, Daniela Danieli, Luigi De Carlo, Marina De  
26  
27 521 Sanctis, Giuseppina De Santes, Patrizia Del Balzo, Gian Piero Del Bono, Chiara Di  
28  
29 522 Francesco, Maria Elisabetta Di Pietro, Maria Chiara Dini, Paolo Fiammengo, Micaela Foco,  
30  
31 523 Maria Teresa Fonte, Maria Frigeri, Andrea Galvagno, Matteo Gaudino, Stefania Genoni,  
32  
33 524 Silvia Giroto, Emma Maria Letizia Giugnini, Gianluca Gornati, Marta Gozzi, Francesca  
34  
35 525 Grassa, Chiara Guidoni, Enrica Heritier, Antonella Lavagetto, Raffaele Limauro, Alessandra  
36  
37 526 Magnelli, Maria Gabriella Maiolino, Monica Malventano, Stefania Manetti, Claudio  
38  
39 527 Mangialavori, Silvia Marchi, Natale Maresca, Federico Marolla, Francesca Marongiu, Agata  
40  
41 528 Martinelli, Chiara Martinez, Nicoletta Mascarello, Fausta Matera, Carla Matiotti, Elisabetta  
42  
43 529 Mazzucchi, Donatella Moggia, Paolo Moretti, Manuela Musetti, Paolo Nardini, Alberto Neri,  
44  
45 530 Patrizia Neri, Flavia Nicoloso, Laura Maria Olimpi, Giancarlo Ottonello, Giacinta Padula,  
46  
47 531 Paolo Maria Paganuzzi, Rosanna Palazzi, Alessandra Palmero, Maria Chiara Parisini, Angela  
48  
49 532 Pasinato, Giovannina Pastorelli, Marilena Pavoni, Lucia Peccarisi, Antonella Pellacani,  
50  
51 533 Cristina Perrera, Michela Picciotti, Ivo Picotto, Tiziana Piunti, Ilaria Porro, Francesca  
52  
53  
54  
55  
56  
57  
58  
59  
60

1  
2  
3 534 Preziosi, Giuseppe Primavera, Miriam Prodi, Maria Letizia Rabbone, Innocenza Rafele,  
4  
5 535 Laura Reali, Franziska Stefanie Rempp, Ada Riundi, Patrizia Rogari, Ippolita Roncoroni,  
6  
7 536 Paolo Rosas, Annarita Russo, Mariagrazia Saccà, Elisabetta Sala, Francesca Sala, Renato  
8  
9 537 Sansone, Francesca Santus, Vittoria Sarno, Alessandra Savino, Raffaella Schirò, Giuseppa  
10  
11 538 Scornavacca\*, Giovanni Giuliano Semprini, Maria Francesca Siracusano, Adelisa Spalla,  
12  
13 539 Gloria Sturaro, Giacomo Toffol, Maria Grazia Toma, Ettore Tomagra, Maria Tortorella,  
14  
15 540 Fausta Trentadue, Marina Trevisan, Silvia Tulisso, Roberta Usella, Anna Valente, Michele  
16  
17 541 Valente, Mariangela Valera, Edda Vernile, Valeria Vicario, Lucia Vignutelli, Paolo Vinci,  
18  
19 542 Lucia Vizziello, Rosette Zand, Marco Zanette, Federica Zanetto, Graziano Zucchi, Maria  
20  
21 543 Luisa Zuccolo. Roberto Cionini and Giuseppa Scornavacca unfortunately passed away.  
22  
23  
24  
25  
26  
27 544  
28

29 545 **REFERENCES**

- 30  
31  
32 546 1 An Executive Summary for The Lancet's Series. Advancing Early Childhood  
33  
34 547 Development: from Science to Scale. The Lancet. 2016. [https://els-jbs-prod-](https://els-jbs-prod-cdn.jbs.elsevierhealth.com/pb-assets/Lancet/stories/series/e cd/Lancet_ECD_Executive_Summary-1507044811487.pdf)  
35  
36 548 [cdn.jbs.elsevierhealth.com/pb-](https://els-jbs-prod-cdn.jbs.elsevierhealth.com/pb-assets/Lancet/stories/series/e cd/Lancet_ECD_Executive_Summary-1507044811487.pdf)  
37  
38 549 [assets/Lancet/stories/series/e cd/Lancet\\_ECD\\_Executive\\_Summary-1507044811487.pdf](https://els-jbs-prod-cdn.jbs.elsevierhealth.com/pb-assets/Lancet/stories/series/e cd/Lancet_ECD_Executive_Summary-1507044811487.pdf)  
39  
40 550 (accessed 28 Mar 2022).  
41  
42  
43  
44 551 2 Black MM, Walker SP, Fernald LCH, *et al.* Early childhood development coming of age:  
45  
46 552 science through the life course. *Lancet Lond Engl* 2017;**389**:77–90. doi:10.1016/S0140-  
47  
48 553 6736(16)31389-7  
49  
50  
51  
52 554 3 Barouki R, Gluckman PD, Grandjean P, *et al.* Developmental origins of non-  
53  
54 555 communicable disease: implications for research and public health. *Environ Health Glob*  
55  
56 556 *Access Sci Source* 2012;**11**:42. doi:10.1186/1476-069X-11-42  
57  
58  
59  
60

- 1  
2  
3 557 4 World Health Organization. Children and adolescents in the WHO European Region.  
4  
5 558 2019.[https://www.who.int/europe/news-room/fact-sheets/item/children-and-adolescents-in-](https://www.who.int/europe/news-room/fact-sheets/item/children-and-adolescents-in-the-who-european-region)  
6  
7 the-who-european-region (accessed 29 Aug 2022).  
8 559  
9  
10  
11 560 5 Pelusi C, Altieri P, Gambineri A, *et al.* Behavioral, socio-environmental, educational and  
12  
13 561 demographic correlates of excess body weight in Italian adolescents and young adults.  
14  
15 562 *Nutrition, Metabolism and Cardiovascular Diseases* 2019;**29**:279–89.  
16  
17 doi:10.1016/j.numecd.2018.11.009  
18 563  
19  
20  
21 564 6 Pillas D, Marmot M, Naicker K, *et al.* Social inequalities in early childhood health and  
22  
23 565 development: a European-wide systematic review. *Pediatr Res* 2014;**76**:418–24.  
24  
25 566 doi:10.1038/pr.2014.122  
26  
27  
28  
29 567 7 Ronfani L, Brumatti LV, Mariuz M, *et al.* The Complex Interaction between Home  
30  
31 568 Environment, Socioeconomic Status, Maternal IQ and Early Child Neurocognitive  
32  
33 569 Development: A Multivariate Analysis of Data Collected in a Newborn Cohort Study.  
34  
35 570 *PLOS ONE* 2015;**10**:e0127052. doi:10.1371/journal.pone.0127052  
36  
37  
38  
39 571 8 Pearce A, Dundas R, Whitehead M, *et al.* Pathways to inequalities in child health. *Arch Dis*  
40  
41 572 *Child* 2019;**104**:998–1003. doi:10.1136/archdischild-2018-314808  
42  
43  
44  
45 573 9 Pillas D, Marmot M, Naicker K, *et al.* Social inequalities in early childhood health and  
46  
47 574 development: a European-wide systematic review. *Pediatr Res* 2014;**76**:418–24.  
48  
49 575 doi:10.1038/pr.2014.122  
50  
51  
52  
53 576 10 Andrea SB, Hooker ER, Messer LC, *et al.* Does the association between early life growth  
54  
55 577 and later obesity differ by race/ethnicity or socioeconomic status? A systematic review.  
56  
57 578 *Ann Epidemiol* 2017;**27**:583-592.e5. doi:10.1016/j.annepidem.2017.08.019  
58  
59  
60

- 1  
2  
3 579 11 Canova C, Cantarutti A. Population-Based Birth Cohort Studies in Epidemiology. *Int J*  
4  
5 580 *Environ Res Public Health* 2020;**17**:5276. doi:10.3390/ijerph17155276  
6  
7  
8  
9 581 12 Larsen PS, Kamper-Jørgensen M, Adamson A, *et al.* Pregnancy and Birth Cohort  
10  
11 582 Resources in Europe: a Large Opportunity for Aetiological Child Health Research:  
12  
13 583 Pregnancy and birth cohort resources in Europe. *Paediatr Perinat Epidemiol*  
14  
15 584 2013;**27**:393–414. doi:10.1111/ppe.12060  
16  
17  
18  
19 585 13 Thompson L, Kemp J, Wilson P, *et al.* What have birth cohort studies asked about  
20  
21 586 genetic, pre- and perinatal exposures and child and adolescent onset mental health  
22  
23 587 outcomes? A systematic review. *Eur Child Adolesc Psychiatry* 2010;**19**:1–15.  
24  
25 588 doi:10.1007/s00787-009-0045-4  
26  
27  
28  
29 589 14 Baxter-Jones AD, Cardy AH, Helms PJ, *et al.* Influence of socioeconomic conditions on  
30  
31 590 growth in infancy: the 1921 Aberdeen birth cohort. *Arch Dis Child* 1999;**81**:5–9.  
32  
33 591 doi:10.1136/adc.81.1.5  
34  
35  
36  
37 592 15 Bousquet J, Anto J, Sunyer J, *et al.* Pooling birth cohorts in allergy and asthma: European  
38  
39 593 Union-funded initiatives - a MeDALL, CHICOS, ENRIECO, and GA<sup>2</sup>LEN joint paper.  
40  
41 594 *Int Arch Allergy Immunol* 2013;**161**:1–10. doi:10.1159/000343018  
42  
43  
44  
45 595 16 Isong IA, Rao SR, Bind M-A, *et al.* Racial and Ethnic Disparities in Early Childhood  
46  
47 596 Obesity. *Pediatrics* 2018;**141**:e20170865. doi:10.1542/peds.2017-0865  
48  
49  
50  
51 597 17 Dodgeon B, Patalay P, Ploubidis GB, *et al.* Exploring the role of early-life circumstances,  
52  
53 598 abilities and achievements on well-being at age 50 years: evidence from the 1958 British  
54  
55 599 birth cohort study. *BMJ Open* 2020;**10**:e031416. doi:10.1136/bmjopen-2019-031416  
56  
57  
58  
59  
60

- 1  
2  
3 600 18 Pansieri C, Pandolfini C, Clavenna A, *et al.* An Inventory of European Birth Cohorts. *Int*  
4  
5 601 *J Environ Res Public Health* 2020;**17**:3071. doi:10.3390/ijerph17093071  
6  
7  
8  
9 602 19 World Health Organization, United Nations Children’s Fund, World Bank Group.  
10  
11 603 *Nurturing care for early childhood development: a framework for helping children*  
12  
13 604 *survive and thrive to transform health and human potential*. Geneva: World Health  
14  
15 605 Organization 2018. <https://apps.who.int/iris/handle/10665/345648> (accessed 29 Mar  
16  
17 606 2022).
- 18  
19  
20  
21 607 20 Bonati M, Campi R. What can we do to improve child health in southern Italy? *PLoS Med*  
22  
23 608 2005;**2**:e250. doi:10.1371/journal.pmed.0020250  
24  
25  
26  
27 609 21 Landi S, Ivaldi E, Testi A. Socioeconomic status and waiting times for health services: An  
28  
29 610 international literature review and evidence from the Italian National Health System.  
30  
31 611 *Health Policy Amst Neth* 2018;**122**:334–51. doi:10.1016/j.healthpol.2018.01.003  
32  
33  
34  
35 612 22 Gruppo di lavoro per la Convenzione sui diritti dell’Infanzia e dell’Adolescenza. I diritti  
36  
37 613 dell’infanzia e dell’adolescenza in Italia – I dati regione per regione 2021. Roma, 30th  
38  
39 614 November 2021. available at [https://gruppocrc.net/documento/i-dati-regione-per-regione-](https://gruppocrc.net/documento/i-dati-regione-per-regione-2021/)  
40  
41 615 2021/ (accessed 9 Sept 2022).  
42  
43  
44  
45 616 23 Porta D, Fantini MP. Prospective cohort studies of newborns in Italy to evaluate the role  
46  
47 617 of environmental and genetic characteristics on common childhood disorders. *Ital J*  
48  
49 618 *Pediatr* 2006;**32**:350–7.  
50  
51  
52  
53 619 24 Porta D, Forastiere F, Di Lallo D, *et al.* [Enrolment and follow-up of a birth cohort in  
54  
55 620 Rome]. *Epidemiol Prev* 2007;**31**:303–8.  
56  
57  
58  
59  
60



- 1  
2  
3 621 25 Lanari M, Vandini S, Adorni F, *et al.* Prenatal tobacco smoke exposure increases  
4  
5 622 hospitalizations for bronchiolitis in infants. *Respir Res* 2015;**16**:152. doi:10.1186/s12931-  
6  
7 623 015-0312-5  
8  
9  
10  
11 624 26 Barchitta M, Maugeri A, La Rosa MC, *et al.* Single Nucleotide Polymorphisms in  
12  
13 625 Vitamin D Receptor Gene Affect Birth Weight and the Risk of Preterm Birth: Results  
14  
15 626 From the “Mamma & Bambino” Cohort and A Meta-Analysis. *Nutrients* 2018;**10**:E1172.  
16  
17 627 doi:10.3390/nu10091172  
18  
19  
20  
21 628 27 Brescianini S, Fagnani C, Toccaceli V, *et al.* An update on the Italian Twin Register:  
22  
23 629 advances in cohort recruitment, project building and network development. *Twin Res*  
24  
25 630 *Hum Genet Off J Int Soc Twin Stud* 2013;**16**:190–6. doi:10.1017/thg.2012.85  
26  
27  
28  
29 631 28 Richiardi L, Baussano I, Vizzini L, *et al.* Feasibility of recruiting a birth cohort through  
30  
31 632 the Internet: the experience of the NINFEA cohort. *Eur J Epidemiol* 2007;**22**:831–7.  
32  
33 633 doi:10.1007/s10654-007-9194-2  
34  
35  
36  
37 634 29 Farchi S, Forastiere F, Vecchi Brumatti L, *et al.* Piccolipiù, a multicenter birth cohort in  
38  
39 635 Italy: protocol of the study. *BMC Pediatr* 2014;**14**:36. doi:10.1186/1471-2431-14-36  
40  
41  
42  
43 636 30 Valent F, Mariuz M, Bin M, *et al.* Associations of prenatal mercury exposure from  
44  
45 637 maternal fish consumption and polyunsaturated fatty acids with child neurodevelopment:  
46  
47 638 a prospective cohort study in Italy. *J Epidemiol* 2013;**23**:360–70.  
48  
49 639 doi:10.2188/jea.je20120168  
50  
51  
52  
53 640 31 Lanari M, Prinelli F, Adorni F, *et al.* Risk factors for bronchiolitis hospitalization during  
54  
55 641 the first year of life in a multicenter Italian birth cohort. *Ital J Pediatr* 2015;**41**:40.  
56  
57 642 doi:10.1186/s13052-015-0149-z  
58  
59  
60

- 1  
2  
3 643 32 Castriotta L, Rosolen V, Biggeri A, *et al.* The role of mercury, selenium and the Se-Hg  
4  
5 644 antagonism on cognitive neurodevelopment: A 40-month follow-up of the Italian mother-  
6  
7 645 child PHIME cohort. *Int J Hyg Environ Health* 2020;**230**:113604.  
8  
9 646 doi:10.1016/j.ijheh.2020.113604  
10  
11  
12  
13 647 33 Medda E, Toccaceli V, Fagnani C, *et al.* The Italian Twin Registry: An Update at 18  
14  
15 648 Years From Its Inception. *Twin Res Hum Genet Off J Int Soc Twin Stud* 2019;**22**:572–8.  
16  
17 649 doi:10.1017/thg.2019.75  
18  
19  
20  
21 650 34 Ruggieri S, Drago G, Colombo P, *et al.* Three contaminated sites in southern Italy. The  
22  
23 651 Neonatal Environment and Health Outcomes cohort: protocol for a longitudinal birth  
24  
25 652 cohort study. *BMJ Open* 2019;**9**:e029471. doi:10.1136/bmjopen-2019-029471  
26  
27  
28  
29 653 35 Canova C, Zabeo V, Pitter G, *et al.* Association of maternal education, early infections,  
30  
31 654 and antibiotic use with celiac disease: a population-based birth cohort study in  
32  
33 655 northeastern Italy. *Am J Epidemiol* 2014;**180**:76–85. doi:10.1093/aje/kwu101  
34  
35  
36  
37 656 36 Pizzi C, Richiardi M, Charles M-A, *et al.* Measuring Child Socio-Economic Position in  
38  
39 657 Birth Cohort Research: The Development of a Novel Standardized Household Income  
40  
41 658 Indicator. *Int J Environ Res Public Health* 2020;**17**:1700. doi:10.3390/ijerph17051700  
42  
43  
44  
45 659 37 van Esso D, del Torso S, Hadjipanayis A, *et al.* Paediatric primary care in Europe:  
46  
47 660 variation between countries. *Arch Dis Child* 2010;**95**:791–5.  
48  
49 661 doi:10.1136/adc.2009.178459  
50  
51  
52  
53 662 38 Hansen S, Strøm M, Maslova E, *et al.* A Comparison of Three Methods to Measure  
54  
55 663 Asthma in Epidemiologic Studies: Results from the Danish National Birth Cohort. *PLoS*  
56  
57 664 *ONE* 2012;**7**:e36328. doi:10.1371/journal.pone.0036328  
58  
59  
60

- 1  
2  
3 665 39 World Health Organization. Health through life stages. 2021.  
4  
5 666 <https://www.euro.who.int/en/health-topics/Life-stages/pages/life-course> (accessed 29 Mar  
6  
7 667 2022).
- 8  
9  
10  
11 668 40 Pansieri C, Clavenna A, Pandolfini C, *et al.* NASCITA Italian birth cohort study: a study  
12  
13 669 protocol. *BMC Pediatr* 2020;**20**:80. doi:10.1186/s12887-020-1961-1
- 14  
15  
16 670 41 Zanetti M, Clavenna A, Pandolfini C, *et al.* Informatics Methodology Used in the Web-  
17  
18 671 Based Portal of the NASCITA Cohort Study: Development and Implementation Study. *J*  
19  
20 672 *Med Internet Res* 2021;**23**:e23087. doi:10.2196/23087
- 21  
22  
23  
24 673 42 CDC. What developmental milestones is your 2-year-old reaching? Centers for Disease  
25  
26 674 Control and Prevention. 2022.  
27  
28 675 <https://www.cdc.gov/ncbddd/actearly/milestones/milestones-2yr.html> (accessed 9 Sep  
29  
30 676 2022).
- 31  
32  
33  
34 677 43 Bertino E, Di Nicola P, Varalda A, *et al.* Neonatal growth charts. *J Matern Fetal Neonatal*  
35  
36 678 *Med* 2012;**25** Suppl 1:67–9. doi:10.3109/14767058.2012.664889
- 37  
38  
39  
40 679 44 Istituto Nazionale di Statistica (ISTAT). Annuario Statistico Italiano 2020. 2020.  
41  
42 680 <https://www.istat.it/it/archivio/251048> (accessed 28 Mar 2022).
- 43  
44  
45  
46 681 45 Eurostat. Statistics (2019 data).  
47  
48 682 <https://ec.europa.eu/eurostat/databrowser/view/tps00017/default/table?lang=en> (accessed  
49  
50 683 28 Mar 2022).
- 51  
52  
53  
54 684 46 Ministero della Salute, Dipartimento della Qualità, Direzione Generale del Sistema  
55  
56 685 Informativo, Ufficio di Direzione Statistica. Certificato di assistenza al parto (CeDAP)-  
57  
58 686 Analisi dell'evento nascita- Anno 2019. Ministero della Salute 2021.  
59  
60

1  
2  
3 687 [https://www.salute.gov.it/imgs/C\\_17\\_pubblicazioni\\_3076\\_allegato.pdf](https://www.salute.gov.it/imgs/C_17_pubblicazioni_3076_allegato.pdf) (accessed 28 Mar  
4  
5 688 2022).

6  
7  
8  
9 689 47 Rusconi F, Gagliardi L, Gori E, *et al.* Perinatal maternal mental health is associated with  
10  
11 690 both infections and wheezing in early childhood. *Pediatr Allergy Immunol Off Publ Eur*  
12  
13 691 *Soc Pediatr Allergy Immunol* 2019;**30**:732–8. doi:10.1111/pai.13103

14  
15  
16 692 48 Bertino E, Spada E, Occhi L, *et al.* Neonatal anthropometric charts: the Italian neonatal  
17  
18 693 study compared with other European studies. *J Pediatr Gastroenterol Nutr* 2010;**51**:353–  
19  
20 694 61. doi:10.1097/MPG.0b013e3181da213e

21  
22  
23  
24 695 49 Euro-Peristat Project. European Perinatal Health Report. Core indicators of the health and  
25  
26 696 care of pregnant women and babies in Europe in 2015. 2018. [www.europeristat.com](http://www.europeristat.com)  
27  
28 697 (accessed 28 Mar 2022).

29  
30  
31  
32 698 50 Laurita Longo V, Odjidja EN, Beia TK, *et al.* “An unnecessary cut?” multilevel health  
33  
34 699 systems analysis of drivers of caesarean sections rates in Italy: a systematic review. *BMC*  
35  
36 700 *Pregnancy Childbirth* 2020;**20**:770. doi:10.1186/s12884-020-03462-1

37  
38  
39  
40 701  
41  
42  
43  
44  
45  
46  
47  
48  
49  
50  
51  
52  
53  
54  
55  
56  
57  
58  
59  
60

STROBE Statement—Checklist of items that should be included in reports of *cohort studies*

|                              | Item No | Recommendation                                                                                                                                                                                    | Page n                         |
|------------------------------|---------|---------------------------------------------------------------------------------------------------------------------------------------------------------------------------------------------------|--------------------------------|
| <b>Title and abstract</b>    | 1       | (a) Indicate the study's design with a commonly used term in the title or the abstract                                                                                                            | 1                              |
|                              |         | (b) Provide in the abstract an informative and balanced summary of what was done and what was found                                                                                               | 2                              |
| <b>Introduction</b>          |         |                                                                                                                                                                                                   |                                |
| Background/rationale         | 2       | Explain the scientific background and rationale for the investigation being reported                                                                                                              | 5-8                            |
| Objectives                   | 3       | State specific objectives, including any prespecified hypotheses                                                                                                                                  | 8                              |
| <b>Methods</b>               |         |                                                                                                                                                                                                   |                                |
| Study design                 | 4       | Present key elements of study design early in the paper                                                                                                                                           | 8-11                           |
| Setting                      | 5       | Describe the setting, locations, and relevant dates, including periods of recruitment, exposure, follow-up, and data collection                                                                   | 8-11                           |
| Participants                 | 6       | (a) Give the eligibility criteria, and the sources and methods of selection of participants. Describe methods of follow-up                                                                        | 9,10                           |
|                              |         | (b) For matched studies, give matching criteria and number of exposed and unexposed                                                                                                               | N/A                            |
| Variables                    | 7       | Clearly define all outcomes, exposures, predictors, potential confounders, and effect modifiers. Give diagnostic criteria, if applicable                                                          | 9,10                           |
| Data sources/<br>measurement | 8*      | For each variable of interest, give sources of data and details of methods of assessment (measurement). Describe comparability of assessment methods if there is more than one group              | 9,10                           |
| Bias                         | 9       | Describe any efforts to address potential sources of bias missing data                                                                                                                            | 10                             |
| Study size                   | 10      | Explain how the study size was arrived at                                                                                                                                                         | N/A<br>(explained to reviewer) |
| Quantitative variables       | 11      | Explain how quantitative variables were handled in the analyses. If applicable, describe which groupings were chosen and why                                                                      | 11                             |
| Statistical methods          | 12      | (a) Describe all statistical methods, including those used to control for confounding<br>PAG DESCR STATISTICS STUFF                                                                               | 11                             |
|                              |         | (b) Describe any methods used to examine subgroups and interactions<br>NONE                                                                                                                       | N/A                            |
|                              |         | (c) Explain how missing data were addressed<br>PAG                                                                                                                                                | 11                             |
|                              |         | (d) If applicable, explain how loss to follow-up was addressed                                                                                                                                    | N/A                            |
|                              |         | (e) Describe any sensitivity analyses                                                                                                                                                             | N/A                            |
| <b>Results</b>               |         |                                                                                                                                                                                                   |                                |
| Participants                 | 13*     | (a) Report numbers of individuals at each stage of study—eg numbers potentially eligible, examined for eligibility, confirmed eligible, included in the study, completing follow-up, and analysed | 9                              |
|                              |         | (b) Give reasons for non-participation at each stage                                                                                                                                              | N/A                            |
|                              |         | (c) Consider use of a flow diagram                                                                                                                                                                | N/A                            |
| Descriptive data             | 14*     | (a) Give characteristics of study participants (eg demographic, clinical, social) and information on exposures and potential confounders                                                          | 12,15                          |
|                              |         | (b) Indicate number of participants with missing data for each variable of interest                                                                                                               | N/A                            |
|                              |         | (c) Summarise follow-up time (eg, average and total amount)                                                                                                                                       | N/A                            |

|    |                          |     |                                                                                |             |
|----|--------------------------|-----|--------------------------------------------------------------------------------|-------------|
| 1  | Outcome data             | 15* | Report numbers of outcome events or summary measures over time                 |             |
| 2  | Main results             | 16  | (a) Give unadjusted estimates and, if applicable, confounder-adjusted          | 12,13,15,16 |
| 3  |                          |     | estimates and their precision (eg, 95% confidence interval). Make clear        |             |
| 4  |                          |     | which confounders were adjusted for and why they were included                 |             |
| 5  |                          |     | (b) Report category boundaries when continuous variables were                  | 12,13,15,18 |
| 6  |                          |     | categorized                                                                    |             |
| 7  |                          |     | (c) If relevant, consider translating estimates of relative risk into absolute | N/A         |
| 8  |                          |     | risk for a meaningful time period                                              |             |
| 9  | Other analyses           | 17  | Report other analyses done—eg analyses of subgroups and interactions,          | N/A         |
| 10 |                          |     | and sensitivity analyses                                                       |             |
| 11 | <b>Discussion</b>        |     |                                                                                |             |
| 12 | Key results              | 18  | Summarise key results with reference to study objectives                       | 11-19       |
| 13 | Limitations              | 19  | Discuss limitations of the study, taking into account sources of potential     | 21          |
| 14 |                          |     | bias or imprecision. Discuss both direction and magnitude of any               |             |
| 15 |                          |     | potential bias                                                                 |             |
| 16 | Interpretation           | 20  | Give a cautious overall interpretation of results considering objectives,      | 19,20       |
| 17 |                          |     | limitations, multiplicity of analyses, results from similar studies, and       |             |
| 18 |                          |     | other relevant evidence                                                        |             |
| 19 | Generalisability         | 21  | Discuss the generalisability (external validity) of the study results          | 17,18       |
| 20 | <b>Other information</b> |     |                                                                                |             |
| 21 | Funding                  | 22  | Give the source of funding and the role of the funders for the present         | 22          |
| 22 |                          |     | study and, if applicable, for the original study on which the present          |             |
| 23 |                          |     | article is based                                                               |             |

\*Give information separately for exposed and unexposed groups.

**Note:** An Explanation and Elaboration article discusses each checklist item and gives methodological background and published examples of transparent reporting. The STROBE checklist is best used in conjunction with this article (freely available on the Web sites of PLoS Medicine at <http://www.plosmedicine.org/>, Annals of Internal Medicine at <http://www.annals.org/>, and Epidemiology at <http://www.epidem.com/>). Information on the STROBE Initiative is available at <http://www.strobe-statement.org>.
